# Supplementary material for: Phenylalanine Tolerance over Time in Phenylketonuria: A Systematic Review and Meta-Analysis
Source: MDPI journal article supplement (doi:10.3390/nu15163506), 2023-08-08
Supplement: s1 [file s1]

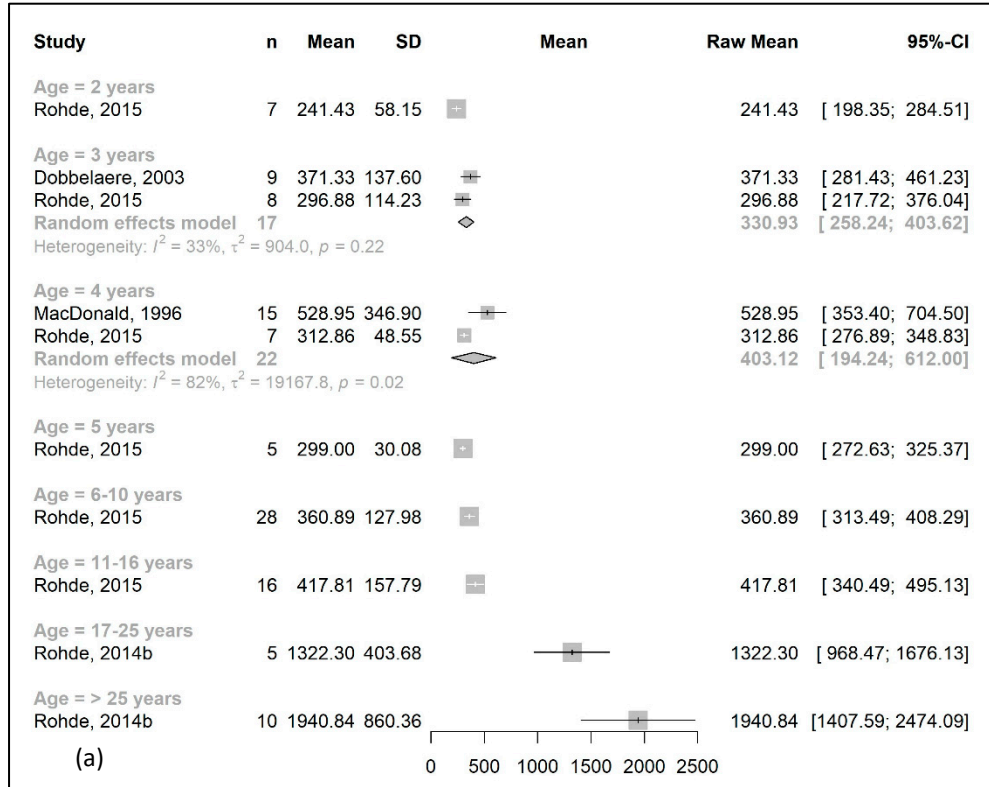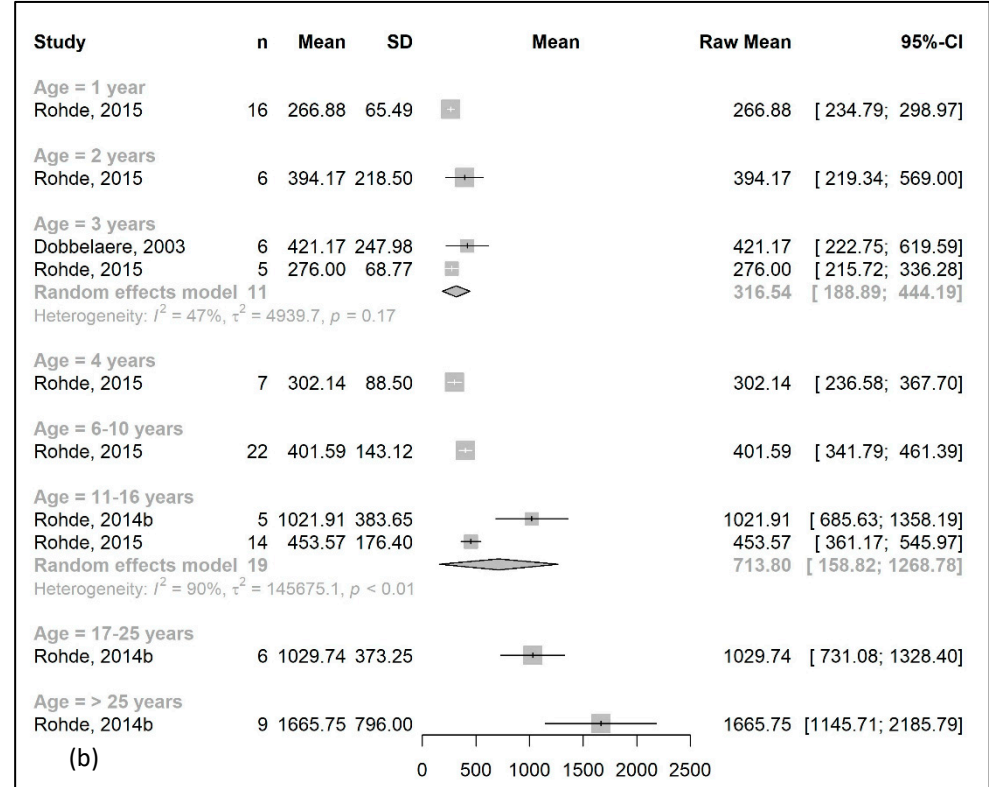

**Supplementary Figure S1.** Phenylalanine intakes (mg/day) of female (a) and male (b) participants in the included studies.

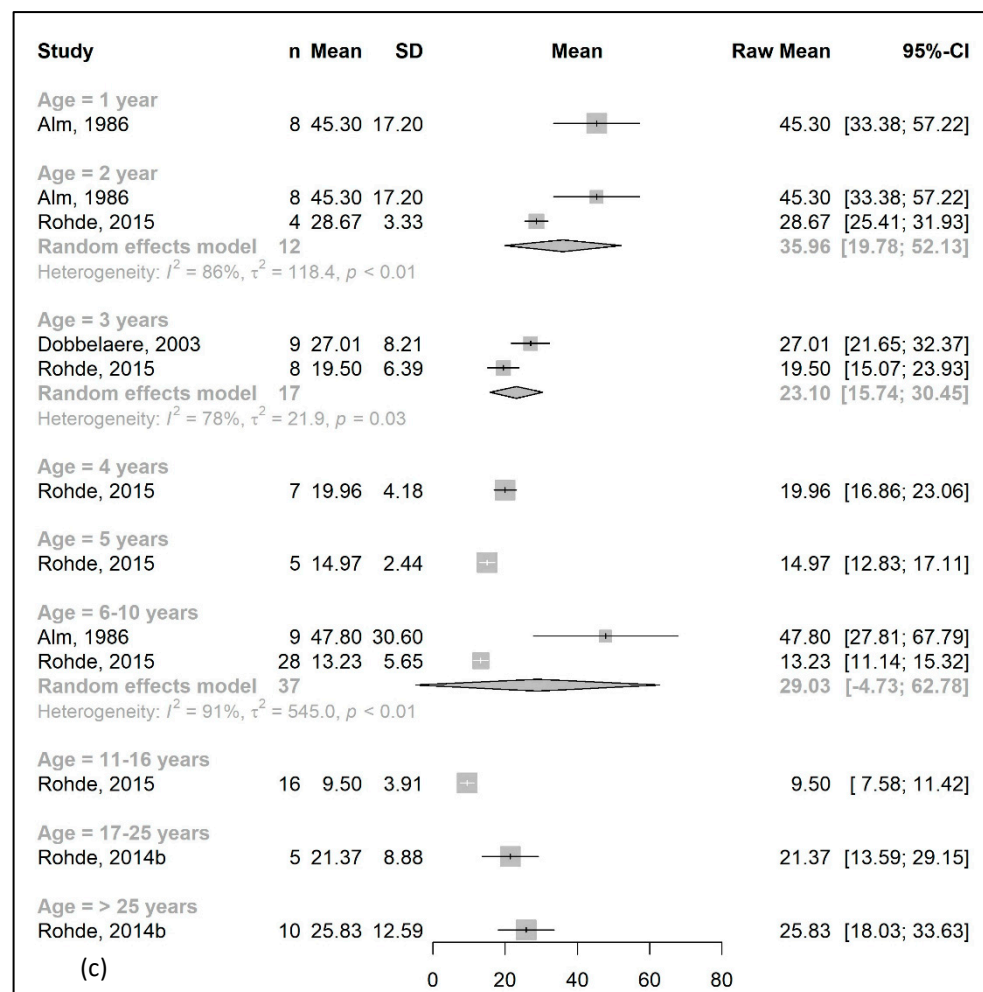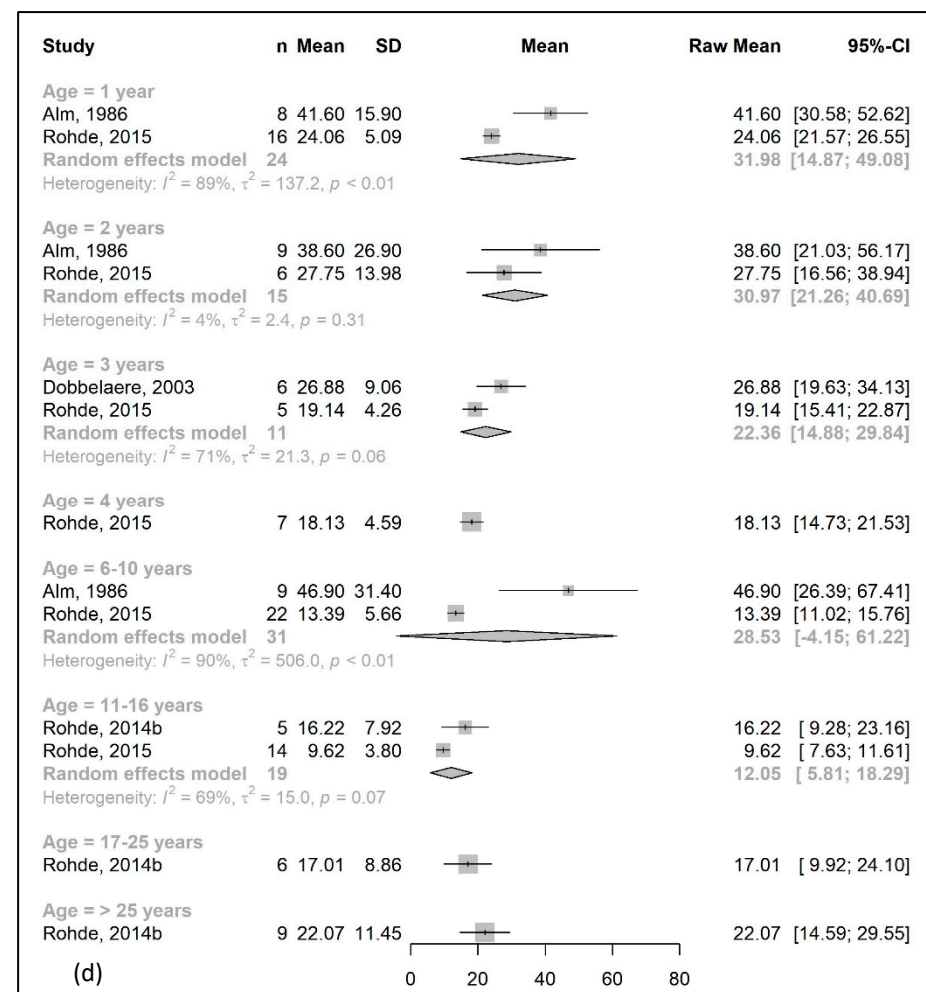

**Supplementary Figure S1.** Phenylalanine intakes per kg body weight (mg/kg/day) of female (c) and male (d) participants in the included studies.

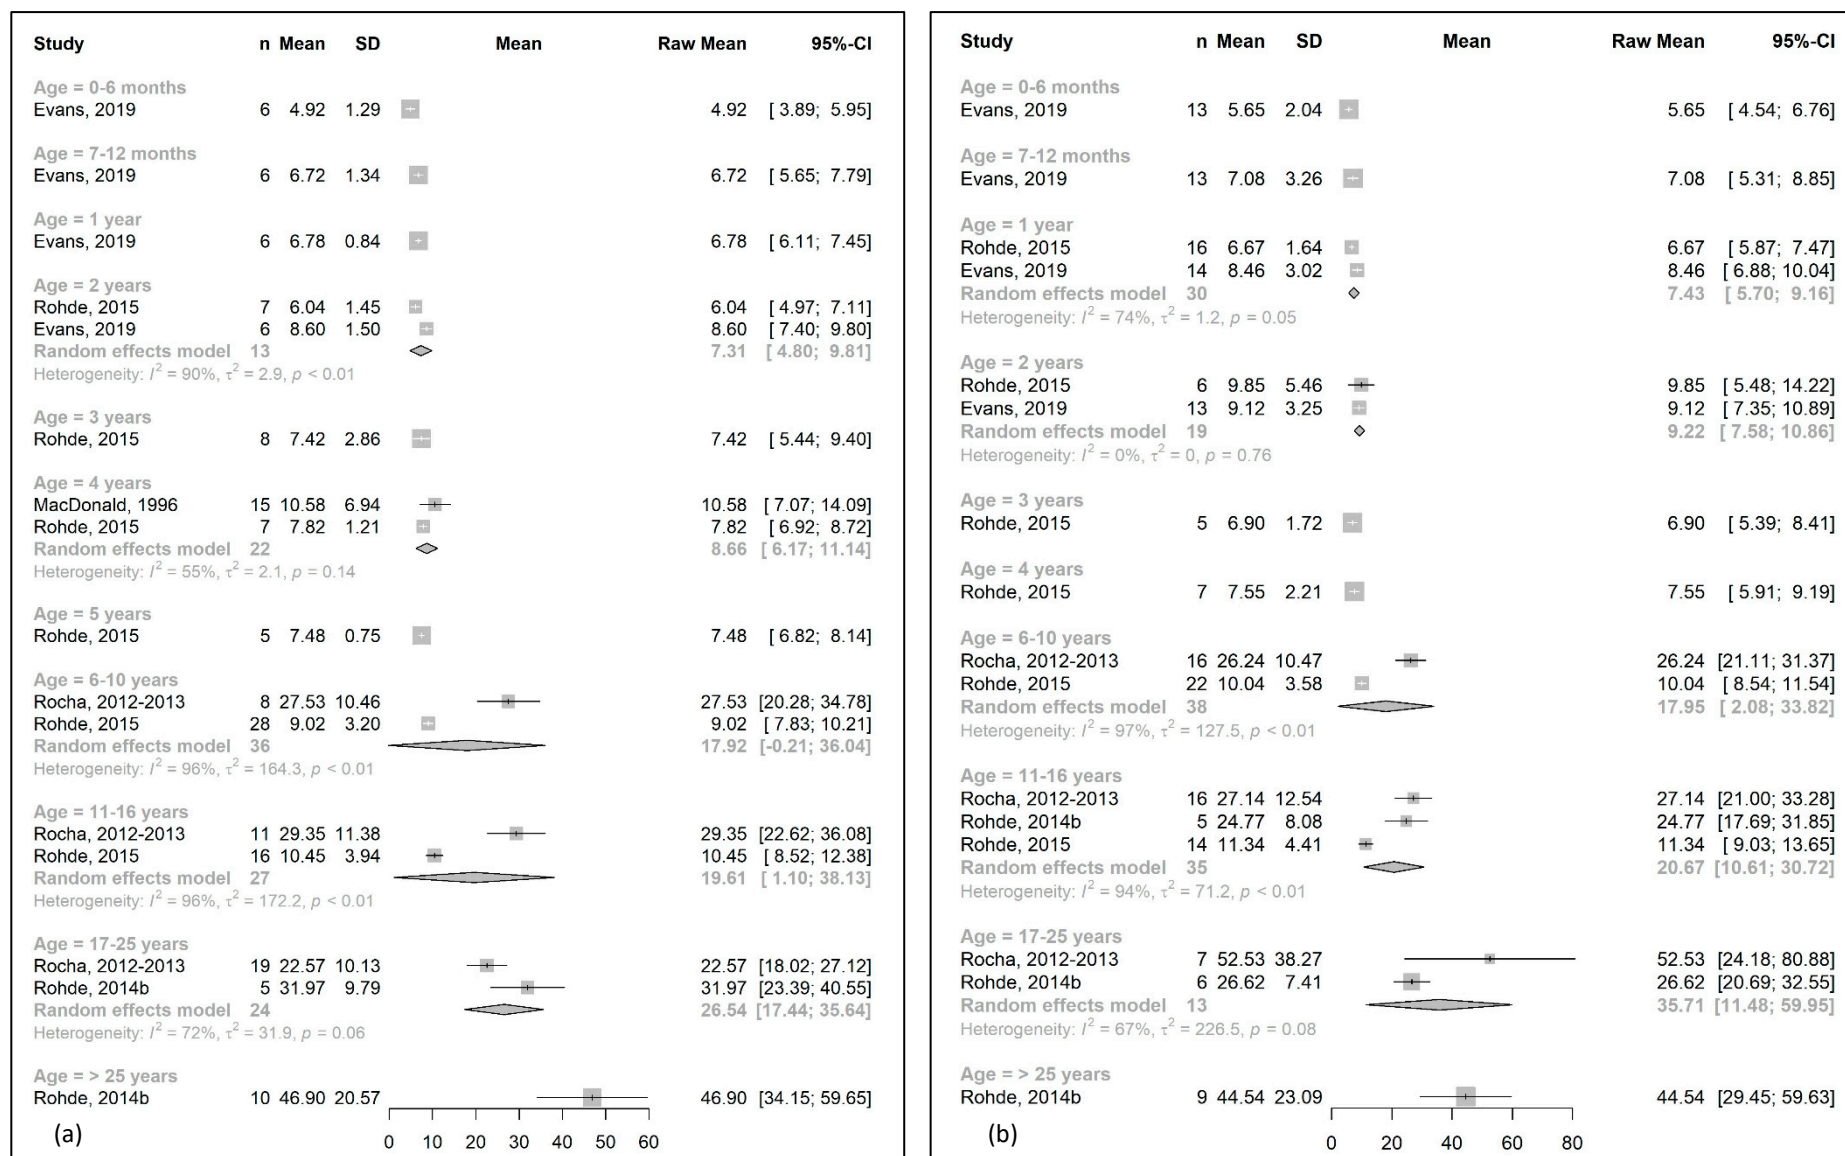

Supplementary Figure S2. Natural protein intakes (g/day) of female (a) and male (b) participants in the included studies.

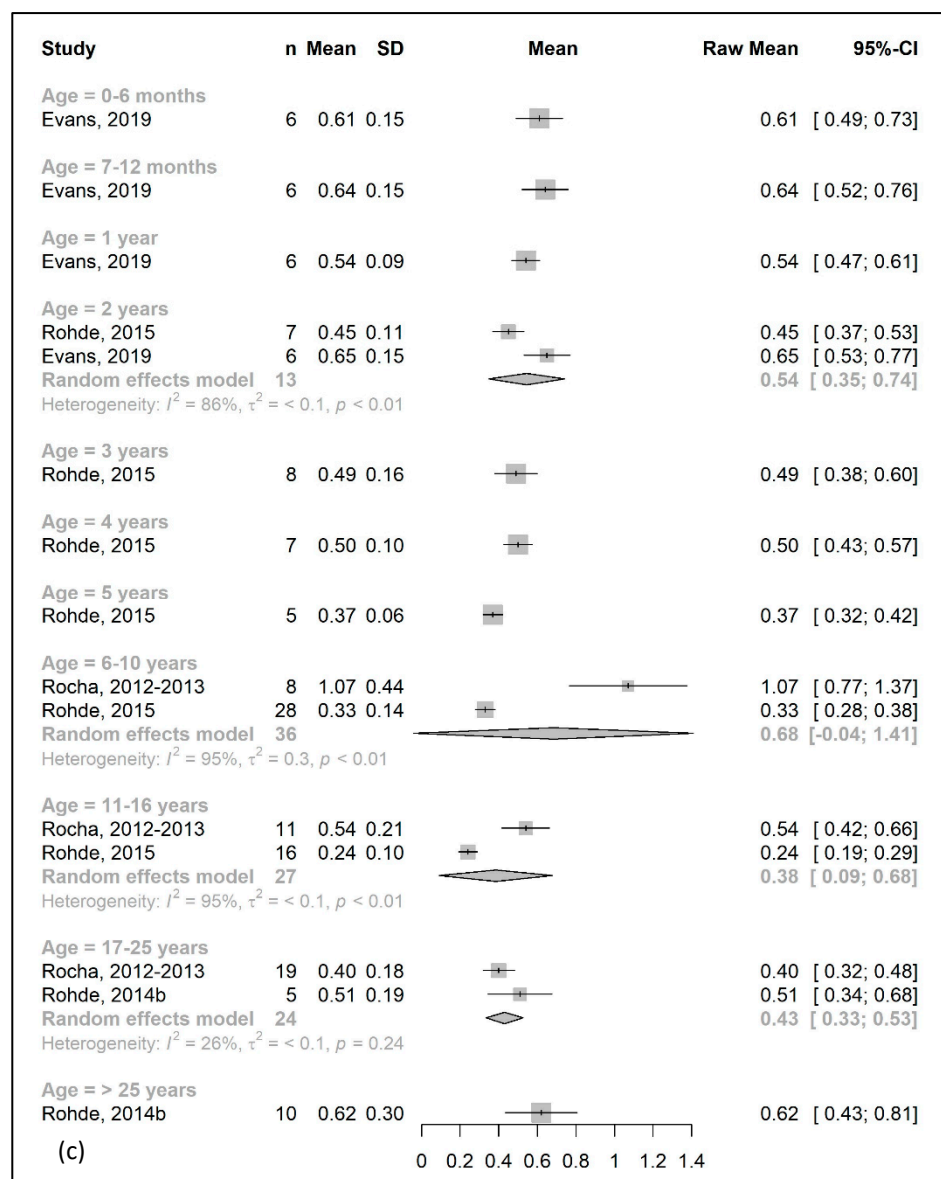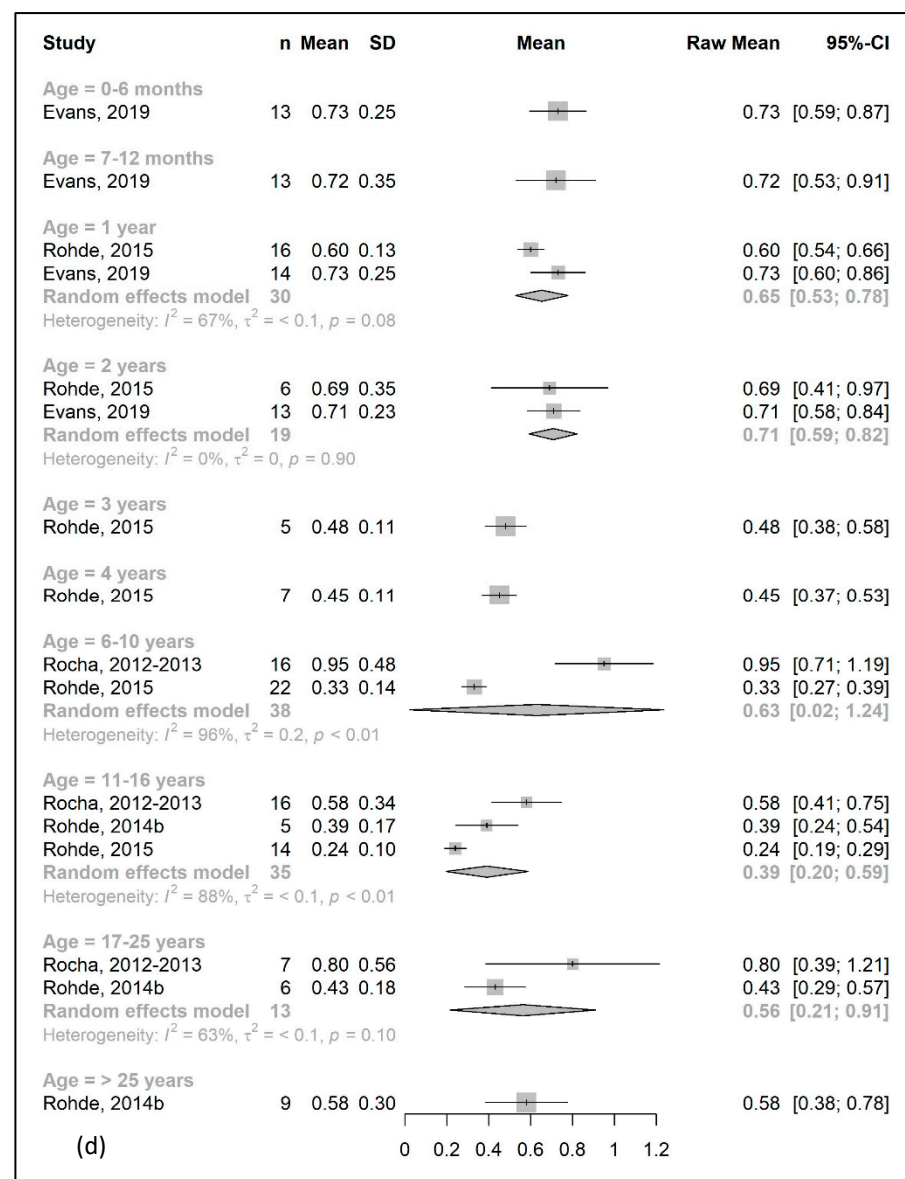

Supplementary Figure S2. Natural protein intakes per kg body weight (g/kg/day) of female (c) and male (d) participants in the included studies.



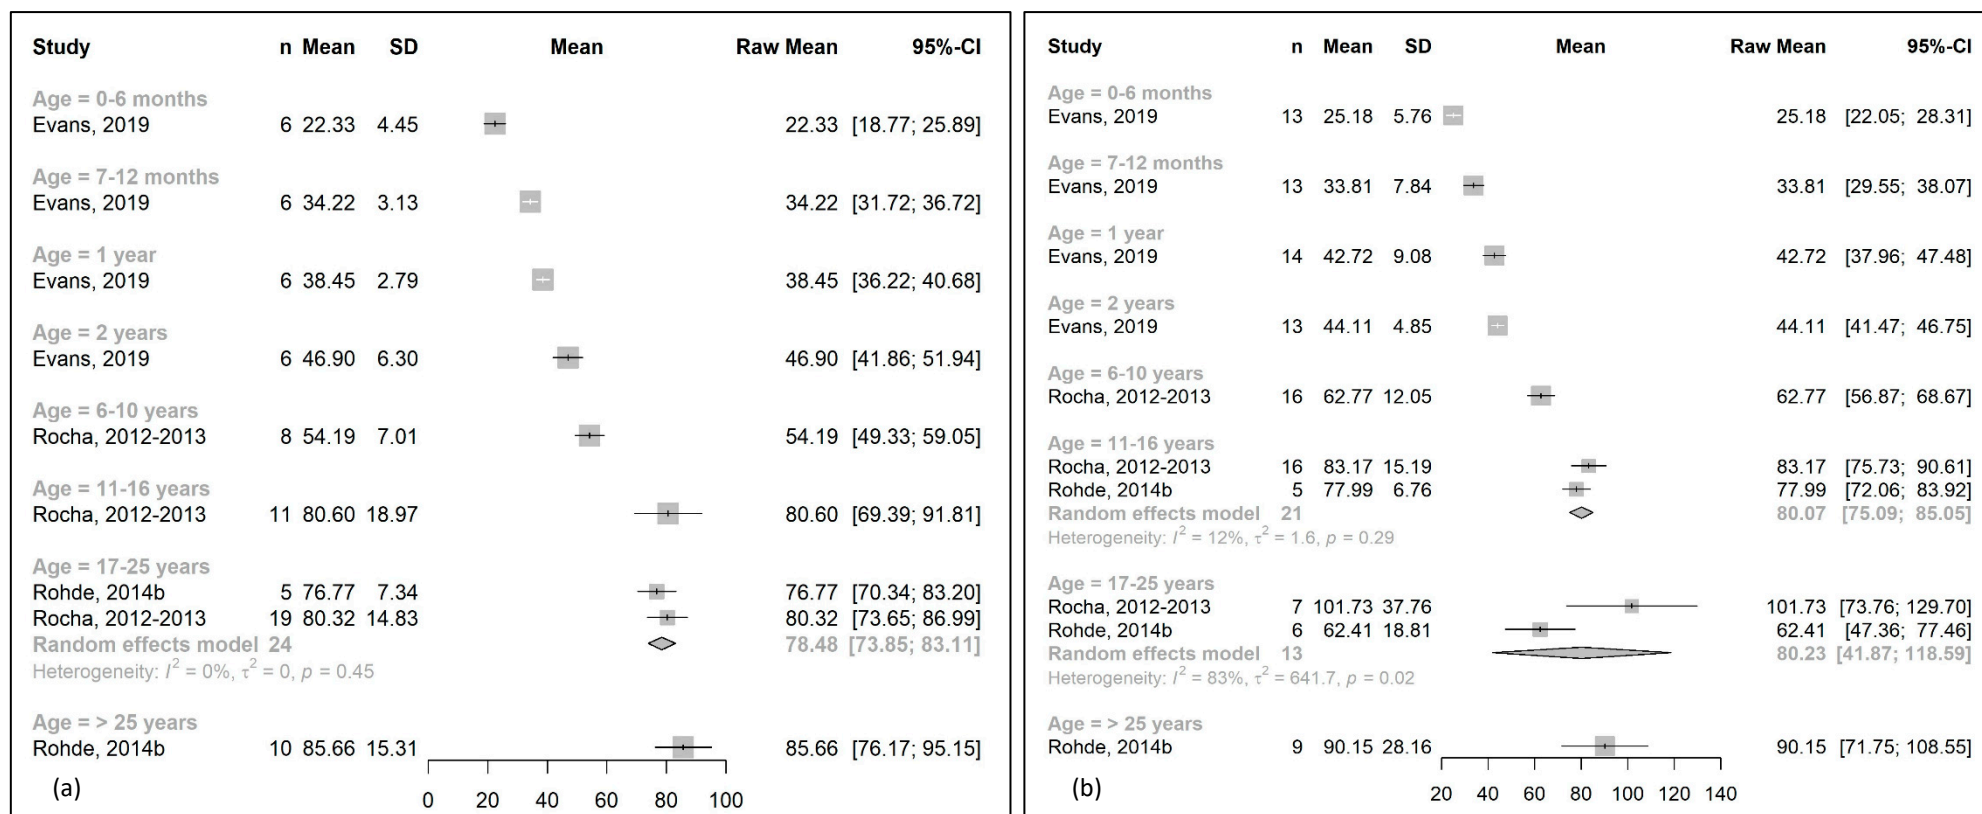

**Supplementary Figure S3.** Total protein intakes (g/day) of female (a) and male (b) participants in the included studies.

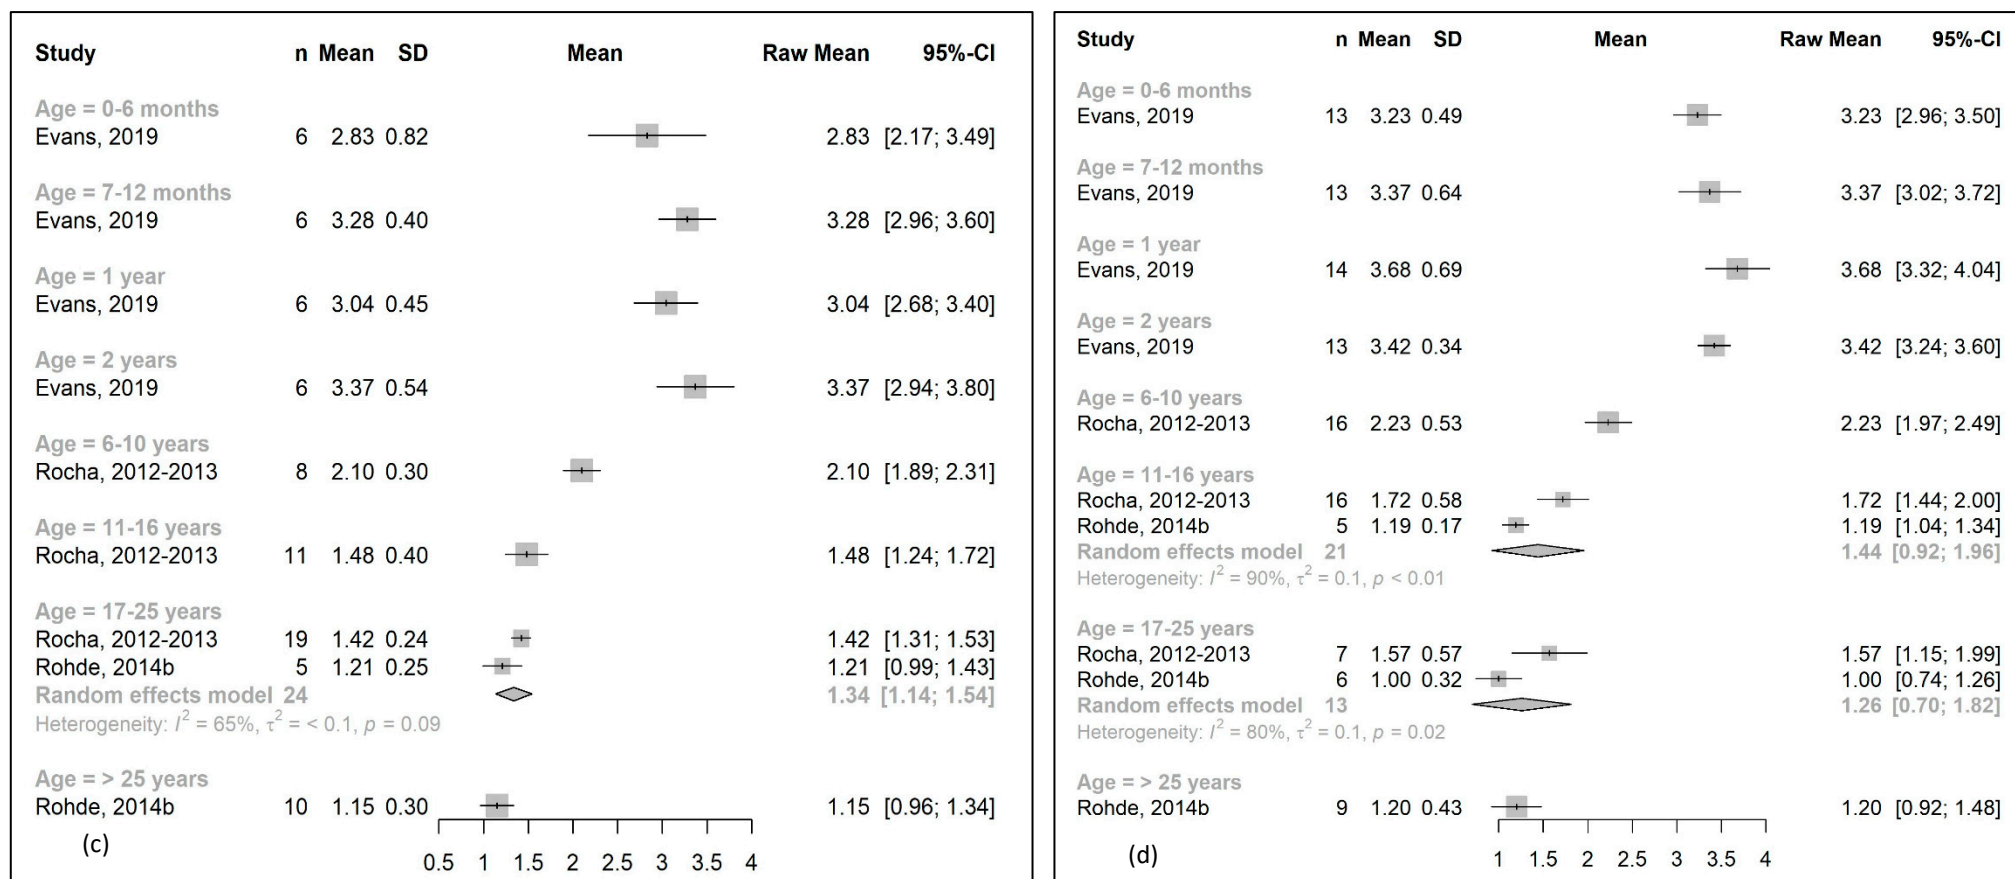

**Supplementary Figure S3.** Total protein intakes per kg body weight (g/kg/day) of female (c) and male (d) participants in the included studies.

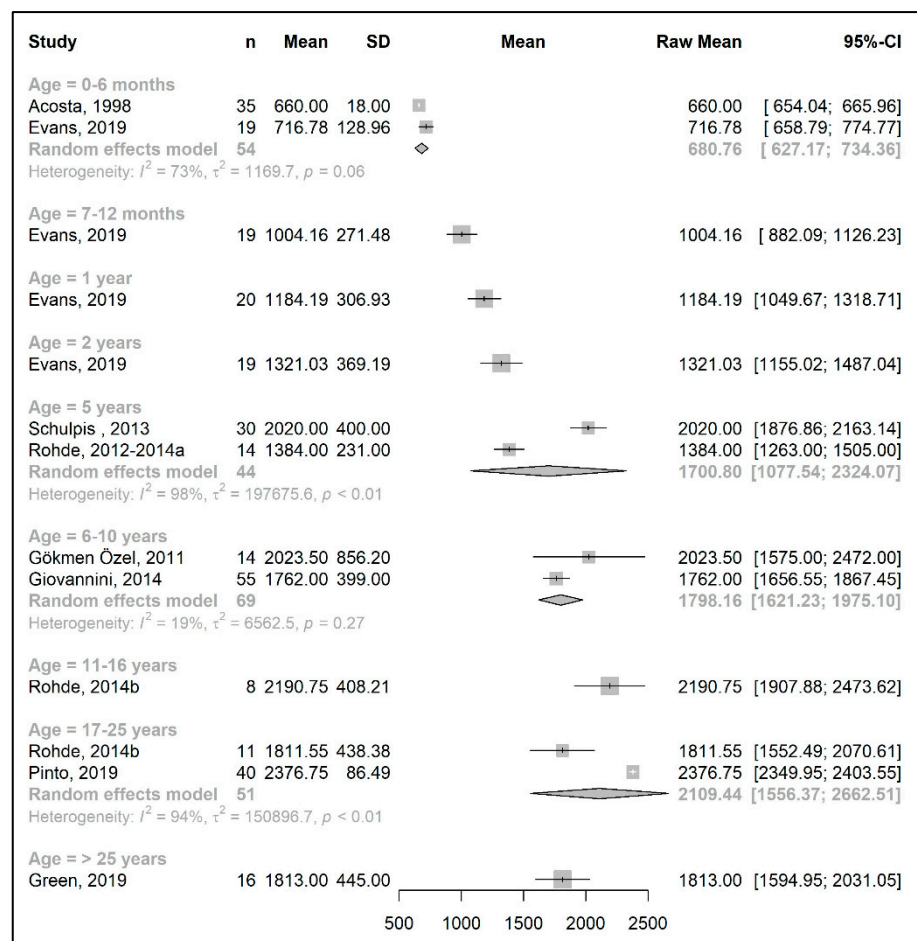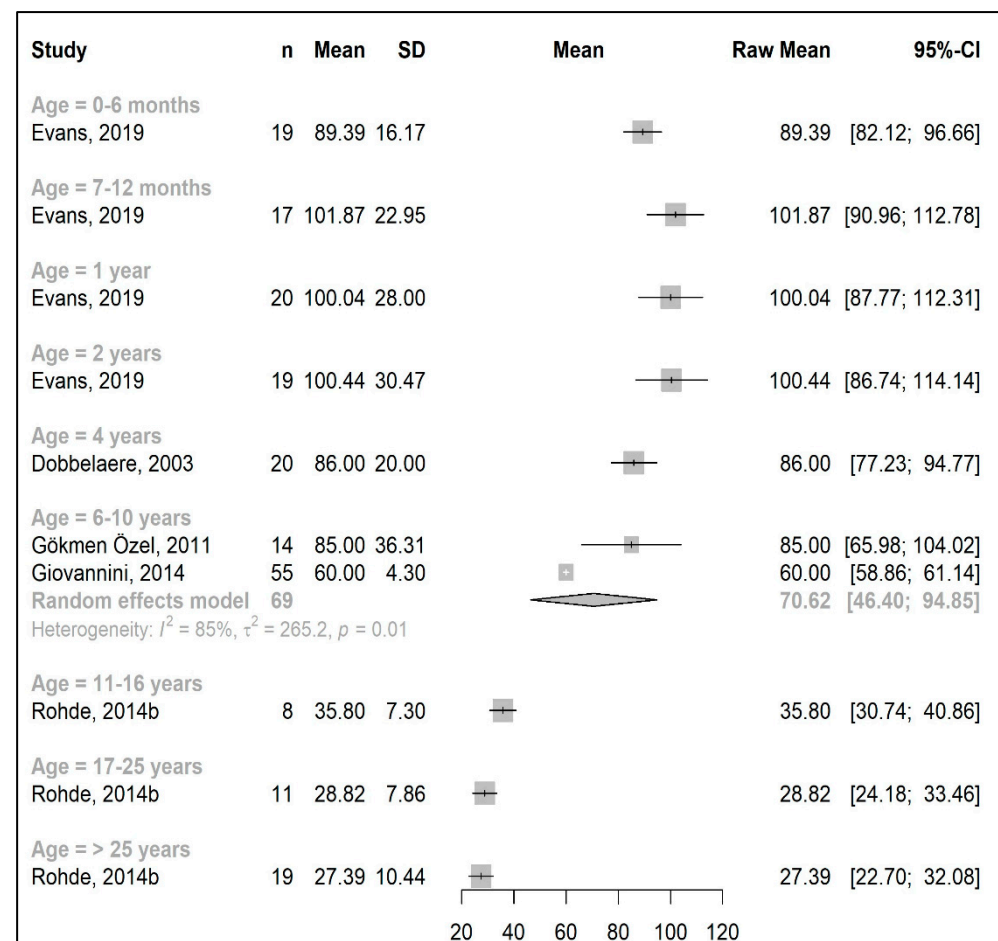

**Supplementary Figures S4 and S5.** Energy intakes per day (kcal/day; **left**) and per kg body weight (kcal/kg/day; **right**) of participants in the included studies.

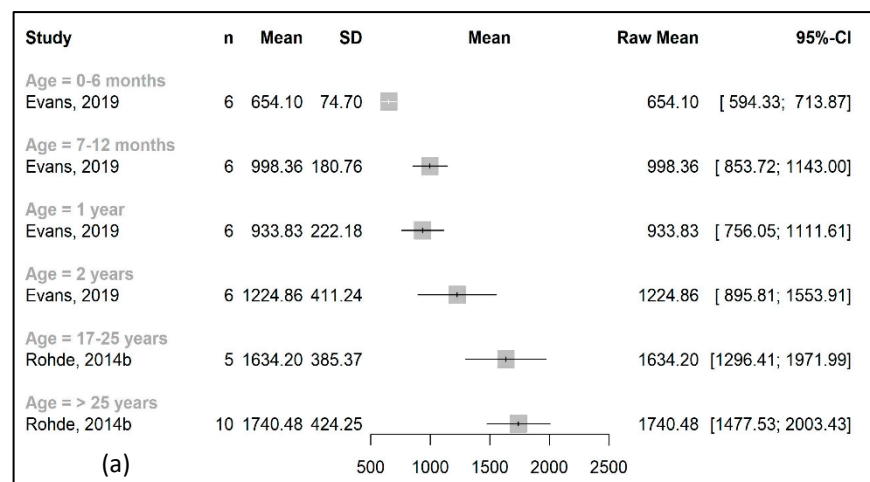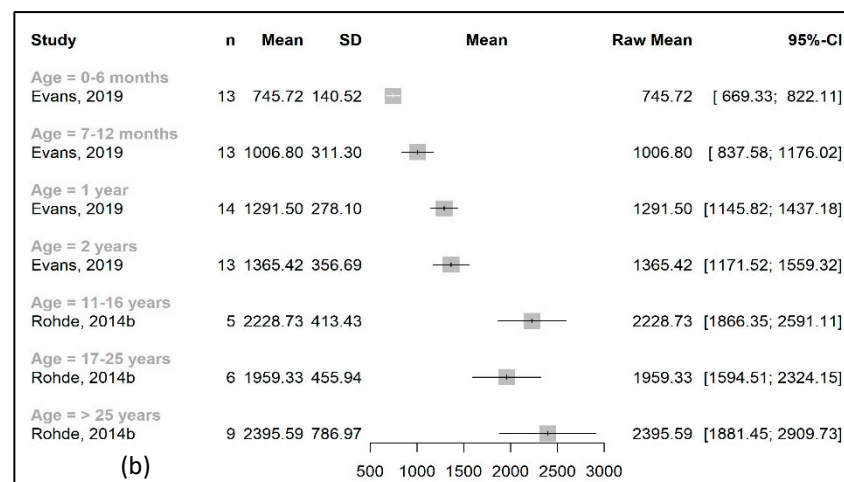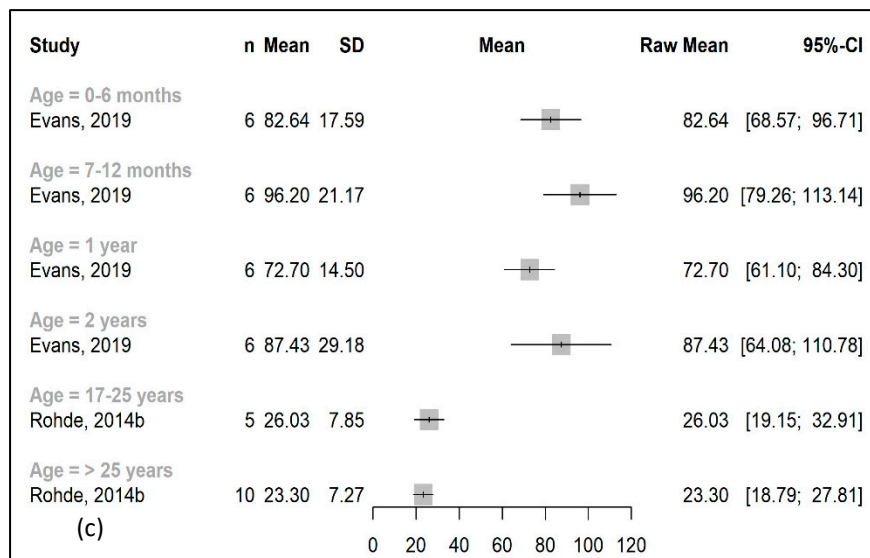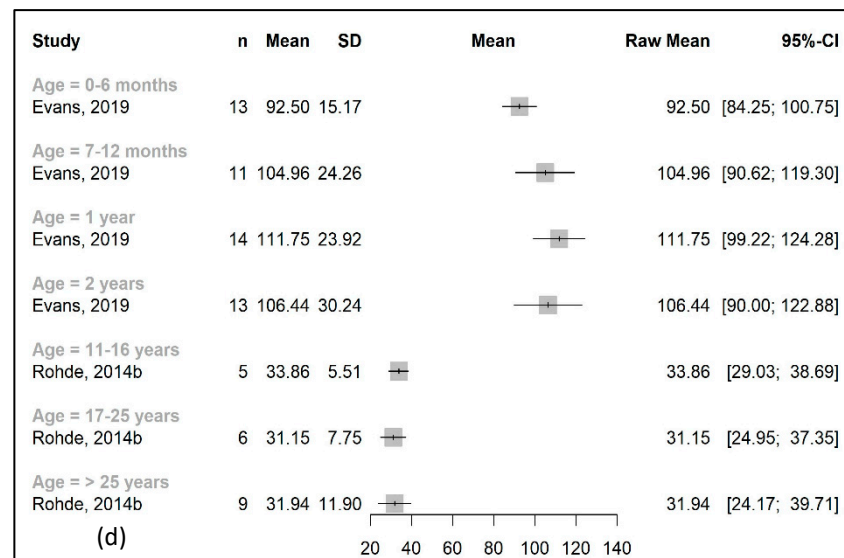

**Supplementary Figure S6.** Energy intakes per day (kcal/day; (a) female, (b) male) and per kg of body weight (kcal/kg/day; (c) female, (d) male) of participants in the included studies..



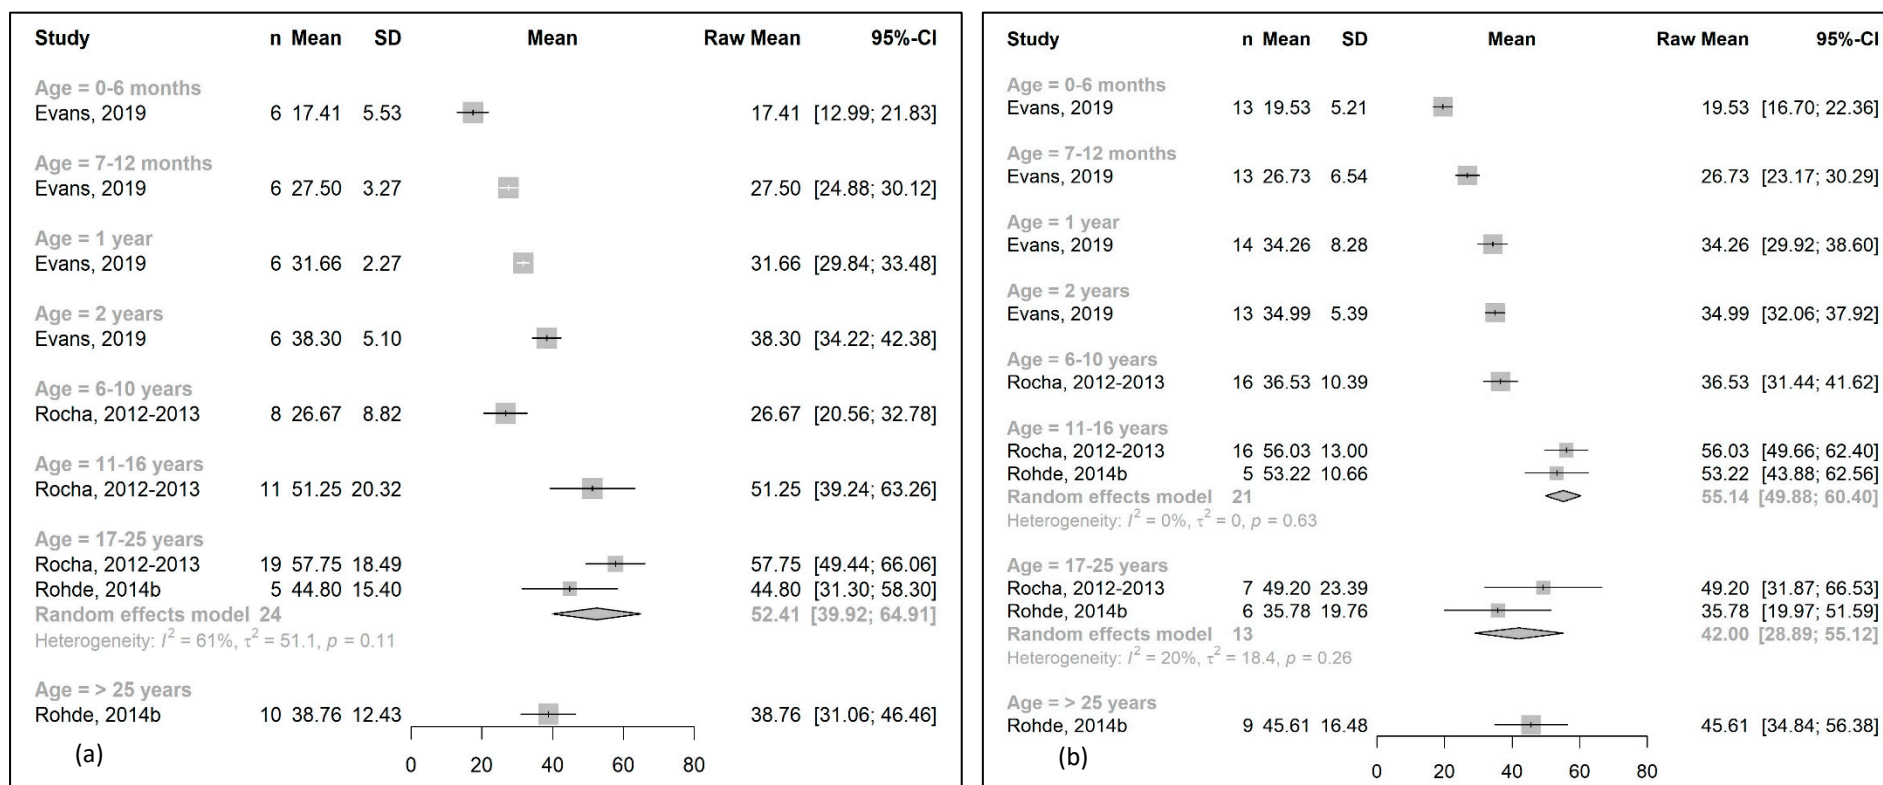

**Supplementary Figures 7a-7b.** Protein equivalent from protein substitute intakes per day (g/day) of female (a) and male (b) participants in the included studies.

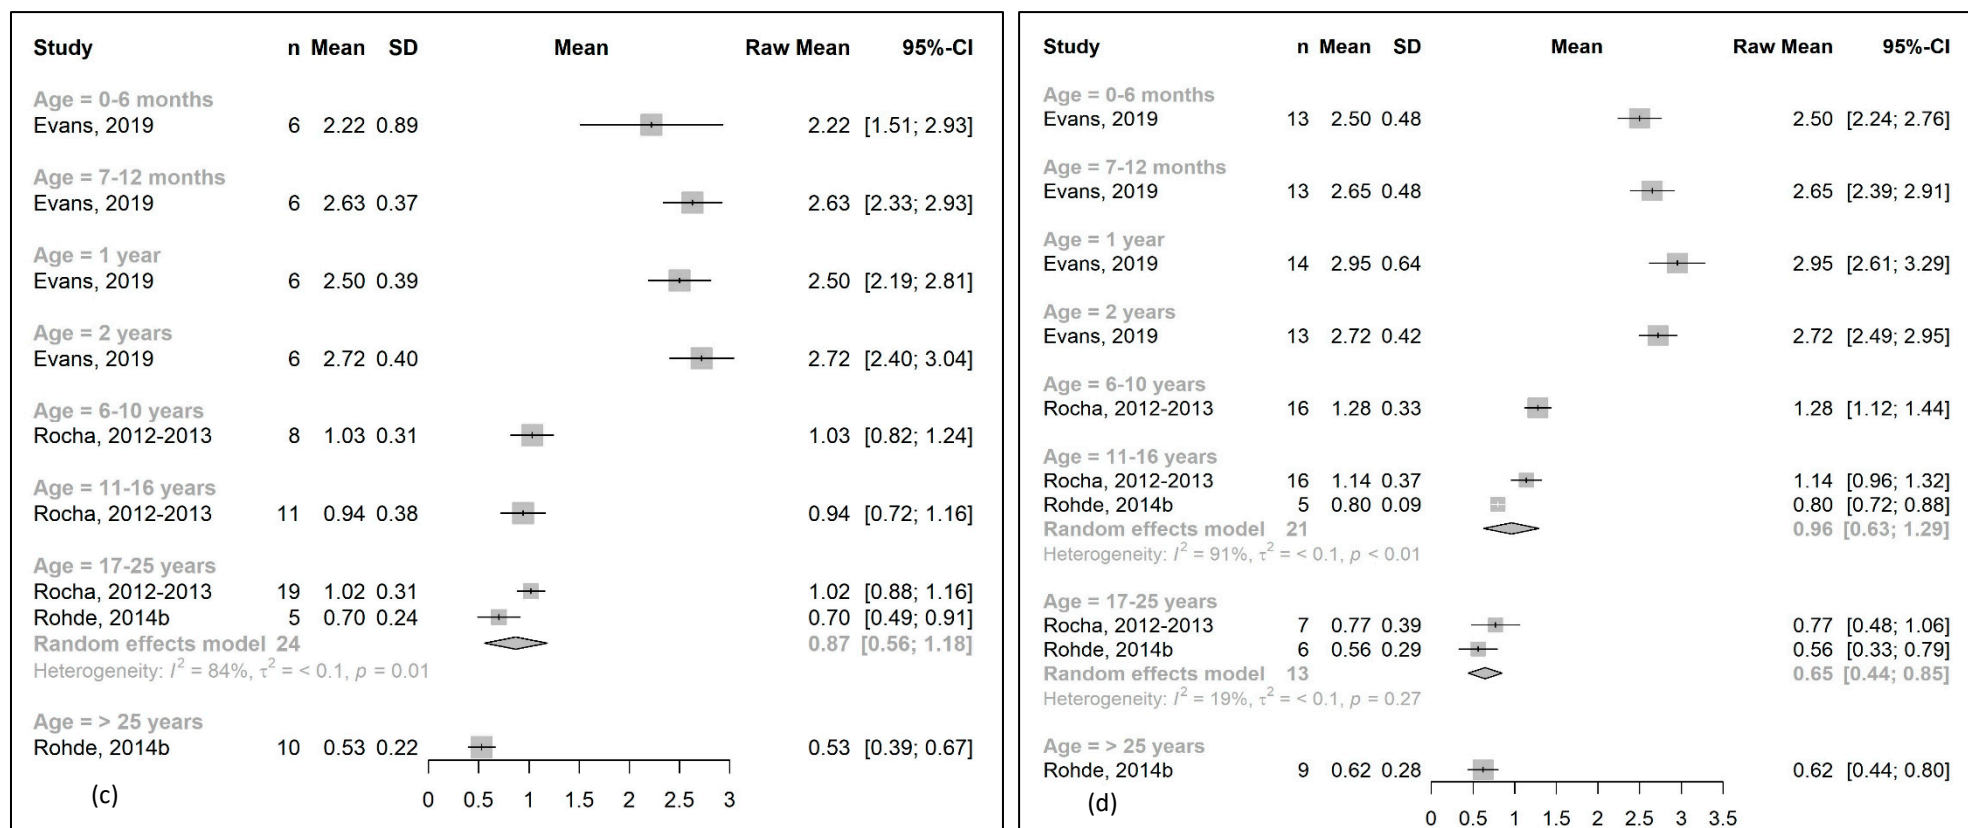

**Supplementary Figures 7c-7d.** Protein equivalent from protein substitute intakes per day (g/kg/day) of female (c) and male (d) participants in the included studies.
