# Supplementary material for: Phenylalanine Tolerance over Time in Phenylketonuria: A Systematic Review and Meta-Analysis
Source: MDPI journal article supplement (doi:10.3390/nu15163506), 2023-08-08
Supplement: s1 [file s1]

**Supplementary Table S1.** Actual dietary intakes of PKU patients in early childhood (0-3 years of age).

| Reference                                    | N           | Age         | Energy           |                    | Phenylalanine                                                              |                  | Natural protein                         |                 | Protein equivalent from protein substitute |                 | Total protein                        |                 |
|----------------------------------------------|-------------|-------------|------------------|--------------------|----------------------------------------------------------------------------|------------------|-----------------------------------------|-----------------|--------------------------------------------|-----------------|--------------------------------------|-----------------|
|                                              |             |             | <i>kcal/day</i>  | <i>kcal/kg/day</i> | <i>mg/day</i>                                                              | <i>mg/kg/day</i> | <i>g/day</i>                            | <i>g/kg/day</i> | <i>g/day</i>                               | <i>g/kg/day</i> | <i>g/day</i>                         | <i>g/kg/day</i> |
| Acosta et al., 1998                          | 20          | 1 mo        | <b>Mean (SD)</b> |                    | <b>Mean (SD)</b>                                                           |                  | <b>Mean (SD)</b>                        |                 | <b>Mean (SD)</b>                           |                 | <b>Mean (SD)</b>                     |                 |
|                                              | 33          | 2 mo        | 571 (23)         |                    | 221 (14)                                                                   |                  | 51 (4)                                  |                 | 9.2 (0.75)                                 |                 | 14.0 (0.7)                           |                 |
|                                              | 31          | 3 mo        | 584 (20)         |                    | 250 (13)                                                                   |                  | 47 (2)                                  |                 | 9.2(0.75)                                  |                 | 14.5 (0.6)                           |                 |
|                                              | 34          | 4 mo        | 626 (22)         |                    | 270 (11)                                                                   |                  | 44 (2)                                  |                 | 10.4 (0.60)                                |                 | 16.1 (0.6)                           |                 |
|                                              | 34          | 5 mo        | 681 (24)         |                    | 264 (15)                                                                   |                  | 38 (2)                                  |                 | 12.5 (0.75)                                |                 | 18.1 (0.7)                           |                 |
|                                              | 33          | 5 mo        | 718 (26)         |                    | 265 (15)                                                                   |                  | 34 (2)                                  |                 | 14.0 (0.75)                                |                 | 19.6 (0.7)                           |                 |
|                                              | 32          | 6 mo        | 572 (24)         |                    | 254 (13)                                                                   |                  | 31 (2)                                  |                 | 14.6 (0.75)                                |                 | 20.0 (0.7)                           |                 |
|                                              | 35          | Total       | 660 (18)         |                    | 255 (10)                                                                   |                  | 40 (1)                                  |                 | 11.9 (0.60)                                |                 | 17.3 (0.6)                           |                 |
| Aldámiz-Echevarría et al., 2014              | N/A         | 0-2y        | N/A              |                    | N/A                                                                        |                  | <b>Median (IQR)</b><br>28.2 (20.8-36.2) |                 | <b>Median (IQR)</b><br>0.8 (0.5-1.0)       |                 | <b>Median (IQR)</b><br>1.4 (1.0-1.7) |                 |
| Aldámiz-Echevarría et al., 2015 <sup>a</sup> | <u>BH4</u>  | <u>BH4</u>  |                  |                    | <b>Mean (SD)</b>                                                           |                  | <b>Mean (SD)</b>                        |                 | <b>Mean (SD)</b>                           |                 | <b>Mean (SD)</b>                     |                 |
|                                              | 22          | 1 y         |                  |                    | 37.1 (19.1)                                                                |                  | 1.4 (1.1)                               |                 | 0.9 (0.6)                                  |                 | 2.2 (1.7)                            |                 |
|                                              | <u>Diet</u> | <u>Diet</u> | N/A              |                    | N/A                                                                        |                  | N/A                                     |                 | N/A                                        |                 | N/A                                  |                 |
|                                              | 44          | 1 y         |                  |                    | <b>Mean (SD)</b><br>28.2 (14.1)                                            |                  | <b>Mean (SD)</b><br>0.6 (0.2)           |                 | <b>Mean (SD)</b><br>1.5 (0.5)              |                 | <b>Mean (SD)</b><br>2.2 (0.5)        |                 |
|                                              |             | 2 y         |                  |                    | 25.8 (17.0)                                                                |                  | 0.6 (0.3)                               |                 | 1.6 (0.8)                                  |                 | 2.1 (0.7)                            |                 |
| Alm et al., 1986                             | 16          | 1 y         |                  |                    | <b>Mean (SD)</b><br>43.4 (16.1)<br><b>Median(range)</b><br>38.5 (30-80)    |                  |                                         |                 |                                            |                 |                                      |                 |
|                                              |             |             | N/A              |                    | N/A                                                                        |                  | N/A                                     |                 | N/A                                        |                 | N/A                                  |                 |
|                                              | 17          | 2 y         |                  |                    | <b>Mean (SD)</b><br>>39.7 (24.8)<br><b>Median(range)</b><br>27 (16 to >80) |                  |                                         |                 |                                            |                 |                                      |                 |
| Hoeksma et al., 2005                         |             | 6 mo        |                  |                    |                                                                            |                  | N/A                                     |                 | N/A                                        |                 | N/A                                  |                 |
|                                              | NP=117      | 1 y         |                  |                    |                                                                            |                  | <b>Mean (SD)</b><br>1.22 (0.53)         |                 | <b>Mean (SD)</b><br>1.46 (0.58)            |                 | <b>Mean (SD)</b><br>2.70 (0.50)      |                 |
|                                              | PS=135      | 2 y         | N/A              |                    | N/A                                                                        |                  | 1.03 (0.41)                             |                 | 1.28 (0.38)                                |                 | 2.36 (0.51)                          |                 |
|                                              | TP=133      | 3 y         |                  |                    |                                                                            |                  | 0.97 (0.46)                             |                 | 1.26 (0.34)                                |                 | 2.25 (0.56)                          |                 |
|                                              |             | Total       |                  |                    |                                                                            |                  | 0.93 (0.51)                             |                 | 1.22 (0.42)                                |                 | 2.20 (0.65)                          |                 |
|                                              |             |             |                  |                    |                                                                            |                  | 0.99 (0.34)                             |                 | 1.29 (0.28)                                |                 | 2.33 (0.42)                          |                 |

**Supplementary Table S1.** Actual dietary intakes of PKU patients in early childhood (0-3 years of age).

| Reference                          | N        | Age             | Energy                    |                           | Phenylalanine |                | Natural protein           |                           | Protein equivalent<br>from protein substitute |                           | Total protein             |                           |
|------------------------------------|----------|-----------------|---------------------------|---------------------------|---------------|----------------|---------------------------|---------------------------|-----------------------------------------------|---------------------------|---------------------------|---------------------------|
|                                    |          |                 | kcal/day                  | kcal/kg/day               | mg/day        | mg/kg/day      | g/day                     | g/kg/day                  | g/day                                         | g/kg/day                  | g/day                     | g/kg/day                  |
| Evans et<br>al., 2019 <sup>b</sup> |          |                 | <i>Mean (SD)</i>          | <i>Mean (SD)</i>          |               |                | <i>Mean (SD)</i>          | <i>Mean (SD)</i>          | <i>Mean (SD)</i>                              | <i>Mean (SD)</i>          | <i>Mean (SD)</i>          | <i>Mean (SD)</i>          |
|                                    | 7 to 11  | 4 mo            | 686 (146.8)               | 95.6 (22.9)               |               |                | 5.6 (1.5)                 | 0.78 (0.16)               | 13.9 (5.0)                                    | 2.0 (0.8)                 | 17.5 (4.2)                | 2.5 (0.6)                 |
|                                    | 7 to 20  | 5 mo            | 735 (160.1)               | 100.1 (22.0)              |               |                | 6.6 (1.5)                 | 0.87 (0.16)               | 18.7 (4.9)                                    | 2.6 (0.8)                 | 21.0 (5.1)                | 2.9 (0.7)                 |
|                                    | 19       | 6 mo            | 717 (129.0)               | 89.4 (16.2)               |               |                | 5.4 (1.8)                 | 0.69 (0.23)               | 18.9 (5.3)                                    | 2.4 (0.6)                 | 24.3 (5.4)                | 3.1 (0.6)                 |
|                                    | 20       | 7 mo            | 805 (176.5)               | 95.0 (18.1)               |               |                | 5.6 (1.8)                 | 0.66 (0.189)              | 21.7 (5.3)                                    | 2.6 (0.5)                 | 27.3 (5.5)                | 3.3 (0.5)                 |
|                                    | 20       | 8 mo            | 871 (217.3)               | 97.4 (23.3)               |               |                | 6.3 (1.6)                 | 0.72 (0.17)               | 23.4 (4.6)                                    | 2.7 (0.5)                 | 29.7 (5.2)                | 3.4 (0.6)                 |
|                                    | 19 to 20 | 9 mo            | 958 (226.5)               | 99.1 (38.7)               |               |                | 6.3 (1.8)                 | 0.69 (0.19)               | 25.7 (3.5)                                    | 2.8 (0.4)                 | 32.0 (4.1)                | 3.5 (0.4)                 |
|                                    | 18 to 19 | 10 mo           | 1018 (315.8)              | 99.9 (38.7)               |               |                | 7.1 (2.1)                 | 0.75 (0.22)               | 26.7 (4.9)                                    | 2.8 (0.4)                 | 33.8 (6.1)                | 3.5 (0.6)                 |
|                                    | 16 to 17 | 11 mo           | 985 (243.0)               | 97.0 (22.9)               |               |                | 7.6 (2.6)                 | 0.77 (0.28)               | 27.2 (5.3)                                    | 2.7 (0.5)                 | 34.9 (6.5)                | 3.5 (0.6)                 |
|                                    | 17 to 19 | 12 mo           | 1004 (271.5)              | 101.9 (23.0)              |               |                | 7.0 (2.8)                 | 0.69 (0.30)               | 27.0 (5.6)                                    | 2.7 (0.4)                 | 33.9 (6.6)                | 3.3 (0.6)                 |
|                                    | 18 to 20 | 15 mo           | 1176 (246.1)              | 102.1 (33.8)              |               |                | 7.9 (2.6)                 | 0.72 (0.26)               | 31.3 (6.7)                                    | 2.9 (0.5)                 | 39.3 (7.4)                | 3.6 (0.6)                 |
|                                    | 20       | 18 mo           | 1184 (306.9)              | 100.0 (28.0)              |               |                | 8.0 (2.7)                 | 0.68 (0.23)               | 33.5 (7.1)                                    | 2.8 (0.6)                 | 41.4 (7.9)                | 3.5 (0.7)                 |
|                                    | 19       | 24 mo           | 1321 (369.2)              | 100.4 (30.5)              |               |                | 9.0 (2.8)                 | 0.69 (0.21)               | 36.0 (5.4)                                    | 2.7 (0.4)                 | 45.0 (5.3)                | 3.4 (0.4)                 |
|                                    |          |                 | <i>Median<br/>(range)</i> | <i>Median<br/>(range)</i> | N/A           |                | <i>Median<br/>(range)</i> | <i>Median<br/>(range)</i> | <i>Median<br/>(range)</i>                     | <i>Median<br/>(range)</i> | <i>Median<br/>(range)</i> | <i>Median<br/>(range)</i> |
|                                    | 7 to 11  | 4 mo            | 661 (369-913)             | 98.3 (58-130)             |               |                | 5.2 (4.4-8.9)             | 0.70 (0.6-1.1)            | 14.0 (5.5-23.9)                               | 2.1 (0.8-3.7)             | 16.9 (10.2-23.9)          | 2.5 (1.5-3.7)             |
|                                    | 7 to 20  | 5 mo            | 689 (482-1083)            | 94.6 (64-141)             |               |                | 6.1 (5.6-10.0)            | 0.83 (0.7-1.2)            | 18.0 (6.1-28.4)                               | 2.5 (0.8-4.2)             | 21.9 (12.0-32.5)          | 2.9 (1.5-4.2)             |
|                                    | 19       | 6 mo            | 699 (529-1021)            | 88.1 (62-133)             |               |                | 5.2 (3.2-9.8)             | 0.65 (0.4-1.3)            | 19.6 (10.9-28.1)                              | 2.4 (1.3-3.5)             | 24.1 (16.5-37.1)          | 3.0 (1.8-4.1)             |
|                                    | 20       | 7 mo            | 784 (583-1187)            | 93.1 (62-127)             |               |                | 5.1 (3.2-10.3)            | 0.62 (0.4-1.1)            | 21.0 (11.5-30.3)                              | 2.7 (1.4-3.4)             | 26.1 (20.5-39.9)          | 3.3 (2.3-4.3)             |
| 20                                 | 8 mo     | 813 (644-1376)  | 90.4 (59-146)             |                           |               | 6.1 (4.5-11.7) | 0.66 (0.5-1.2)            | 23.0 (15.0-32.2)          | 2.7 (1.6-3.3)                                 | 28.8 (21.3-43.9)          | 3.4 (2.3-4.5)             |                           |
| 19 to 20                           | 9 mo     | 928 (593-1502)  | 101.5 (11-153)            |                           |               | 6.0 (4.2-10.7) | 0.61 (0.5-1.1)            | 25.1 (19.8-31.8)          | 2.9 (2.2-3.3)                                 | 30.2 (27.1-42.5)          | 3.5 (2.7-4.4)             |                           |
| 18 to 19                           | 10 mo    | 1003 (611-1910) | 98.5 (60-172)             |                           |               | 7.2 (4.2-13.7) | 0.75 (0.4-1.4)            | 26.6 (17.2-35.1)          | 2.9 (2.0-3.3)                                 | 32.7 (22.3-45.5)          | 3.6 (2.5-4.5)             |                           |
| 16 to 17                           | 11 mo    | 934 (703-1613)  | 98.3 (61-138)             |                           |               | 7.0 (4.3-15.5) | 0.71 (0.4-1.6)            | 26.5 (18.5-38.0)          | 2.7 (2.0-3.8)                                 | 32.8 (28.4-53.5)          | 3.4 (2.7-5.4)             |                           |
| 17 to 19                           | 12 mo    | 952 (621-1756)  | 106.2 (62-150)            |                           |               | 6.1 (4.3-15.5) | 0.65 (0.4-1.5)            | 27.0 (18.6-37.7)          | 2.7 (2.0-3.7)                                 | 33.3 (24.7-53.2)          | 3.4 (2.6-5.2)             |                           |
| 18 to 20                           | 15 mo    | 1132 (768-1644) | 103.6 (72-153)            |                           |               | 7.5 (3.0-15.5) | 0.69 (0.3-1.4)            | 31.8 (20.2-43.7)          | 2.8 (2.1-4.0)                                 | 38.8 (26.8-59.2)          | 3.4 (2.7-5.4)             |                           |
| 20                                 | 18 mo    | 1161 (596-2014) | 96.8 (55-167)             |                           |               | 7.6 (5.3-17.5) | 0.63 (0.4-1.4)            | 32.1 (24.6-51.7)          | 2.7 (1.9-4.2)                                 | 40.0 (33.5-61.1)          | 3.3 (2.3-5.0)             |                           |
| 19                                 | 24 mo    | 1667 (682-1912) | 90.3 (54-166)             |                           |               | 8.4 (6.0-18.0) | 0.66 (0.4-1.3)            | 36.4 (25.0-46.2)          | 2.7 (1.9-3.5)                                 | 43.4 (34.9-56.8)          | 3.4 (2.3-4.0)             |                           |
| Kindt et<br>al., 1983              | 15       | 4 mo            |                           |                           |               |                |                           |                           |                                               |                           |                           | <i>Median (range)</i>     |
|                                    | 15       | 6 mo            |                           |                           |               |                |                           |                           |                                               |                           |                           | 2.6 (2.1-3.1)             |
|                                    | 16       | 9 mo            |                           |                           |               |                |                           |                           |                                               |                           |                           | 2.1 (1.7-2.8)             |
|                                    | 16       | 12 mo           | N/A                       |                           | N/A           |                | N/A                       |                           | N/A                                           |                           | N/A                       | 2.0 (1.6-2.6)             |
|                                    | 16       | 1.5 y           |                           |                           |               |                |                           |                           |                                               |                           |                           | 1.8 (1.5-2.7)             |
|                                    | 16       | 2 y             |                           |                           |               |                |                           |                           |                                               |                           |                           | 1.7 (1.3-2.5)             |
|                                    | 11       | 2.5 y           |                           |                           |               |                |                           |                           |                                               |                           |                           | 1.6 (1.2-2.4)             |
|                                    |          |                 |                           |                           |               |                |                           |                           |                                               |                           |                           | 1.6 (1.2-2.3)             |

**Supplementary Table S1.** Actual dietary intakes of PKU patients in early childhood (0-3 years of age).

| Reference            | N  | Age   | Energy          |                    | Phenylalanine                          |                       | Natural protein       |                       | Protein equivalent from protein substitute |                  | Total protein |                  |
|----------------------|----|-------|-----------------|--------------------|----------------------------------------|-----------------------|-----------------------|-----------------------|--------------------------------------------|------------------|---------------|------------------|
|                      |    |       | <i>kcal/day</i> | <i>kcal/kg/day</i> | <i>mg/day</i>                          | <i>mg/kg/day</i>      | <i>g/day</i>          | <i>g/kg/day</i>       | <i>g/day</i>                               | <i>g/kg/day</i>  | <i>g/day</i>  | <i>g/kg/day</i>  |
|                      | 11 | 3 y   |                 |                    |                                        |                       |                       |                       |                                            |                  |               | 1.6 (1.2-2.1)    |
| Ponzone et al., 2008 | 22 | 2 mo  | N/A             |                    | <i>Mean (SD)</i><br>284.1 (53.8)       | N/A                   | N/A                   |                       | N/A                                        |                  | N/A           |                  |
|                      |    |       |                 |                    | <i>Median (range)</i><br>280 (220-390) |                       |                       |                       |                                            |                  |               |                  |
| Rohde et al., 2015   |    |       | N/A             |                    | <i>Mean (SD)</i>                       | <i>Mean (SD)</i>      | <i>Mean (SD)</i>      | <i>Mean (SD)</i>      | N/A                                        |                  | N/A           |                  |
|                      | 20 | 1 y   |                 |                    | 267.0 (59.8)                           | 25.0 (5.1)            | 6.7 (1.5)             | 0.6 (0.1)             |                                            |                  |               |                  |
|                      | 13 | 2 y   |                 |                    | 311.9 (166.9)                          | 22.6 (10.8)           | 7.8 (4.2)             | 0.6 (0.3)             |                                            |                  |               |                  |
|                      | 13 | 3 y   |                 |                    | 288.8 (96.4)                           | 19.4 (5.5)            | 7.2 (2.4)             | 0.5 (0.1)             |                                            |                  |               |                  |
|                      | 46 | 0-3 y |                 |                    | 285.9 (108.5)                          | 22.7 (7.4)            | 7.1 (2.7)             | 0.6 (0.2)             |                                            |                  |               |                  |
|                      |    |       |                 |                    | <i>Median (range)</i>                  | <i>Median (range)</i> | <i>Median (range)</i> | <i>Median (range)</i> |                                            |                  |               |                  |
|                      | 20 | 1 y   |                 |                    | 250 (190-450)                          | 24.6 (16.9-33.7)      | 6.3 (4.8-11.3)        | 0.6 (0.4-0.8)         |                                            |                  |               |                  |
|                      | 13 | 2 y   |                 |                    | 270 (160-800)                          | 19.2 (12.9-54.4)      | 6.8 (4.0-20.0)        | 0.5 (0.3-1.4)         |                                            |                  |               |                  |
|                      | 13 | 3 y   |                 |                    | 260 (180-550)                          | 18.2 (13.4-34.4)      | 6.5 (4.5-13.8)        | 0.5 (0.3-0.9)         |                                            |                  |               |                  |
|                      | 46 | 0-3 y |                 |                    | 255 (160-800)                          | 20.4 (12.9-54.4)      | 6.4 (4.0-20.0)        | 0.5 (0.3-1.4)         |                                            |                  |               |                  |
| Thiele et al., 2017  |    |       | N/A             |                    | N/A                                    | N/A                   | N/A                   | <i>Mean (SD)</i>      | N/A                                        | <i>Mean (SD)</i> | N/A           | <i>Mean (SD)</i> |
|                      | 82 | 1 y   |                 |                    |                                        |                       |                       | 0.7 (0.2)             |                                            | 1.6 (0.4)        |               | 2.3 (0.4)        |
|                      | 90 | 2 y   |                 |                    |                                        |                       |                       | 0.5 (0.1)             |                                            | 1.6 (0.4)        |               | 2.1 (0.4)        |
|                      | 83 | 3 y   |                 |                    |                                        |                       |                       | 0.5 (0.1)             |                                            | 1.6 (0.7)        |               | 2.0 (0.5)        |

Abbreviations: PKU, phenylketonuria; N, number of patients in the age group; mo, months; y, years; SD, standard deviation; N/A, not available; IQR, inter quartile range; BH4, tetrahydrobiopterin; NP, natural protein; TP, total protein; PS, protein equivalent from protein substitute.

<sup>a</sup> Data of BH4 group refers to the baseline intakes of patients who were treated with BH4; diet group includes the baseline and follow-up data of patients who were treated with a phenylalanine restricted diet.

<sup>b</sup> The sample size was shown as a range where the number of included patients was different for energy and protein intakes (e.g. due to missing data, loss to follow-up, etc.)

**Supplementary Table S2.** Actual dietary intakes of PKU patients in late childhood (4-10 years of age).

| Reference                                    | N            | Age                      | Dietary intakes                |                              |                                        |                                           |                                   |                                         |                                            |                                         |                                      |                                         |
|----------------------------------------------|--------------|--------------------------|--------------------------------|------------------------------|----------------------------------------|-------------------------------------------|-----------------------------------|-----------------------------------------|--------------------------------------------|-----------------------------------------|--------------------------------------|-----------------------------------------|
|                                              |              |                          | Energy                         |                              | Phenylalanine                          |                                           | Natural protein                   |                                         | Protein equivalent from protein substitute |                                         | Total protein                        |                                         |
|                                              |              |                          | <i>kcal/day</i>                | <i>kcal/kg/day</i>           | <i>mg/day</i>                          | <i>mg/kg/day</i>                          | <i>g/day</i>                      | <i>g/kg/day</i>                         | <i>g/day</i>                               | <i>g/kg/day</i>                         | <i>g/day</i>                         | <i>g/kg/day</i>                         |
| Aldámiz-Echevarría et al., 2013 <sup>a</sup> | 36           | BH4 <sub>1</sub><br>5 y  |                                |                              |                                        | <i>Median (IQR)</i><br>29.9 (18.3-52.3)   |                                   |                                         | <i>Median (IQR)</i><br>0.9 (0.7-1.2)       |                                         | <i>Median (IQR)</i><br>1.8 (1.0-3.6) |                                         |
|                                              | 10           | BH4 <sub>2</sub><br>5 y  |                                |                              |                                        | <i>Median (IQR)</i><br>30.8 (24.6-54.8)   |                                   |                                         | <i>Median (IQR)</i><br>0.7 (0.5-1.2)       |                                         | <i>Median (IQR)</i><br>1.7 (1.3-2.2) |                                         |
|                                              | 72           | Diet <sub>1</sub><br>5 y | N/A                            |                              | N/A                                    | <i>Median (IQR)</i><br>19.2 (9.3-31.6)    | N/A                               |                                         | N/A                                        | <i>Median (IQR)</i><br>1.3 (1.0-1.8)    | N/A                                  | <i>Median (IQR)</i><br>2.0 (1.3-2.4)    |
|                                              |              | 7 y                      |                                |                              |                                        | 12.9 (7.9-20.3)                           |                                   |                                         | <i>Median (IQR)</i><br>1.2 (0.9-1.8)       |                                         | <i>Median (IQR)</i><br>1.4 (1.0-2.4) |                                         |
|                                              | 20           | Diet <sub>2</sub><br>5 y |                                |                              |                                        | <i>Median (IQR)</i><br>9.9 (8.2-21.8)     |                                   |                                         | <i>Median (IQR)</i><br>1.5 (1.0-1.7)       |                                         | <i>Median (IQR)</i><br>2.0 (1.6-2.4) |                                         |
|                                              |              | 10 y                     |                                |                              |                                        | 10.9 (8.8-13.7)                           |                                   |                                         | <i>Median (IQR)</i><br>1.1 (0.8-1.3)       |                                         | <i>Median (IQR)</i><br>1.6 (1.2-1.9) |                                         |
| Aldámiz-Echevarría et al., 2014              | N/A          | 2-9 y                    | N/A                            |                              | N/A                                    | <i>Median (IQR)</i><br>15.5 (10.9-20.4)   | N/A                               |                                         | N/A                                        | <i>Median (IQR)</i><br>1.3 (1.0-1.7)    | N/A                                  | <i>Median (IQR)</i><br>1.8 (1.4-2.3)    |
| Daly et al., 2019                            | 18           | 10 y                     | N/A                            |                              | N/A                                    |                                           | <i>Median (range)</i><br>5 (3-30) | N/A                                     | <i>Median (range)</i><br>60 (40-80)        | N/A                                     | N/A                                  |                                         |
| Dobbelaere et al., 2003 <sup>b</sup>         | 20<br>Phe=15 | 4.5 y                    | <i>Mean</i><br>1264            | <i>Mean (SD)</i><br>86 (20)  | <i>Mean (SD)</i><br>391 (182.8)        | <i>Mean (SD)</i><br>27 (8.2)              | N/A                               |                                         | N/A                                        |                                         | <i>Mean</i><br>24.5                  | <i>Mean (SD)</i><br>1.67 (0.23)         |
|                                              |              |                          |                                | <i>Range</i><br>61-128       | <i>Median (range)</i><br>348 (204-768) | <i>Median (range)</i><br>26.6 (18.5-42.4) |                                   |                                         |                                            |                                         |                                      | <i>Range</i><br>1.2-2.1                 |
| Evans et al., 2017                           | 32           | 9 y                      | N/A                            |                              | N/A                                    |                                           | N/A                               | <i>Median (range)</i><br>0.5 (0.18-0.8) | N/A                                        | <i>Median (range)</i><br>1.54 (0.8-2.7) | N/A                                  | <i>Median (range)</i><br>2.05 (1.0-3.5) |
| Giovannini et al., 2014                      | 55           | 9 y                      | <i>Mean (SD)</i><br>1762 (399) | <i>Mean (SD)</i><br>60 (4.3) | <i>Mean</i><br>398                     | N/A                                       | <i>Mean</i><br>13.2               | <i>Mean (SD)</i><br>0.5 (0.3)           | N/A                                        | <i>Mean (SD)</i><br>0.15 (0.47)         | <i>Mean</i><br>54.2                  | <i>Mean</i><br>1.95                     |

**Supplementary Table S2.** Actual dietary intakes of PKU patients in late childhood (4-10 years of age)

| Reference                 | N  | Age    | Dietary intakes                          |                                      |                                         |                                        |                                         |                                         |                                            |                                           |                                            |                                           |
|---------------------------|----|--------|------------------------------------------|--------------------------------------|-----------------------------------------|----------------------------------------|-----------------------------------------|-----------------------------------------|--------------------------------------------|-------------------------------------------|--------------------------------------------|-------------------------------------------|
|                           |    |        | Energy                                   |                                      | Phenylalanine                           |                                        | Natural protein                         |                                         | Protein equivalent from protein substitute |                                           | Total protein                              |                                           |
|                           |    |        | <i>kcal/day</i>                          | <i>kcal/kg/day</i>                   | <i>mg/day</i>                           | <i>mg/kg/day</i>                       | <i>g/day</i>                            | <i>g/kg/day</i>                         | <i>g/day</i>                               | <i>g/kg/day</i>                           | <i>g/day</i>                               | <i>g/kg/day</i>                           |
| Gökmen-Özel et al., 2011  | 14 | 6 y    | <i>Median (range)</i><br>1728 (857-3781) | <i>Median (range)</i><br>72 (36-160) | <i>Median (range)</i><br>390 (190-1310) | <i>Median (range)</i><br>17.1 (8-55.5) | <i>Median (range)</i><br>7.8 (3.8-26.2) | <i>Median (range)</i><br>0.32 (0.2-1.1) | <i>Median (range)</i><br>58.1 (37.8-74.5)  | <i>Median (range)</i><br>2.4 (1.35-3.0)   | <i>Median (range)</i><br>66.2 (41.6-100.7) | <i>Median (range)</i><br>2.78 (1.55-3.99) |
| Huemer et al., 2007       | 34 | 9-10y  | N/A                                      | N/A                                  | N/A                                     | N/A                                    | <i>Mean (SD)</i><br>0.3 (0.2)           | N/A                                     | <i>Mean (SD)</i><br>0.9 (0.2)              | <i>Mean (SD)</i><br>33.7 (10.3)           | <i>Mean (SD)</i><br>1.2 (0.3)              |                                           |
|                           |    |        |                                          |                                      |                                         |                                        | <i>Median (range)</i><br>0.24 (0.1-1.1) |                                         | <i>Median (range)</i><br>0.84 (0.6-1.4)    | <i>Median (range)</i><br>32.5 (11.3-32.5) | <i>Median (range)</i><br>1.1 (0.8-2.4)     |                                           |
| Kindt et al., 1983        | 10 | 3.5 y  | N/A                                      | N/A                                  | N/A                                     | N/A                                    | N/A                                     | N/A                                     | N/A                                        | N/A                                       | <i>Median (range)</i><br>1.5 (1.23-2.0)    |                                           |
|                           | 7  | 4 y    |                                          |                                      |                                         |                                        |                                         |                                         |                                            |                                           | <i>Median (range)</i><br>1.7 (1.5-1.9)     |                                           |
|                           | 7  | 5 y    |                                          |                                      |                                         |                                        |                                         |                                         |                                            |                                           | <i>Median (range)</i><br>1.6 (1.36-1.7)    |                                           |
|                           | 3  | 6 y    |                                          |                                      |                                         |                                        |                                         |                                         |                                            |                                           | <i>Median (range)</i><br>1.5 (1.5-1.5)     |                                           |
| MacDonald et al., 2006    | 25 | 6 y    | N/A                                      | N/A                                  | <i>Mean (SD)</i><br>485 (180)           | <i>Mean (SD)</i><br>9.7 (3.6)          | <i>Mean (SD)</i><br>59.4 (9.3)          | N/A                                     | N/A                                        | N/A                                       |                                            |                                           |
|                           |    |        |                                          |                                      | <i>Median (range)</i><br>450 (250-1050) | <i>Median (range)</i><br>9 (5-21)      | <i>Median (range)</i><br>60 (40-80)     |                                         |                                            |                                           |                                            |                                           |
| Rocha et al., 2012 & 2013 | 2  | 4 y    | N/A                                      | N/A                                  | N/A                                     | N/A                                    | <i>Mean (SD)</i><br>21.30 (13.15)       | <i>Mean (SD)</i><br>1.13 (0.57)         | <i>Mean (SD)</i><br>24.51 (0.72)           | <i>Mean (SD)</i><br>1.36 (0.22)           | <i>Mean (SD)</i><br>45.81 (12.43)          | <i>Mean (SD)</i><br>2.49 (0.34)           |
|                           | 4  | 5 y    |                                          |                                      |                                         |                                        | <i>Mean (SD)</i><br>13.73 (4.89)        | <i>Mean (SD)</i><br>0.69 (0.17)         | <i>Mean (SD)</i><br>30.18 (5.69)           | <i>Mean (SD)</i><br>1.58 (0.47)           | <i>Mean (SD)</i><br>43.91 (6.18)           | <i>Mean (SD)</i><br>2.27 (0.47)           |
|                           | 2  | 6 y    |                                          |                                      |                                         |                                        | <i>Mean (SD)</i><br>31.20 (8.49)        | <i>Mean (SD)</i><br>1.15 (0.57)         | <i>Mean (SD)</i><br>33.80 (15.83)          | <i>Mean (SD)</i><br>1.13 (0.27)           | <i>Mean (SD)</i><br>65.00 (7.35)           | <i>Mean (SD)</i><br>2.28 (0.30)           |
|                           | 6  | 7 y    |                                          |                                      |                                         |                                        | <i>Mean (SD)</i><br>25.02 (11.22)       | <i>Mean (SD)</i><br>0.94 (0.32)         | <i>Mean (SD)</i><br>25.52 (6.38)           | <i>Mean (SD)</i><br>1.04 (0.41)           | <i>Mean (SD)</i><br>50.53 (7.05)           | <i>Mean (SD)</i><br>1.99 (0.29)           |
|                           | 5  | 8 y    |                                          |                                      |                                         |                                        | <i>Mean (SD)</i><br>27.14 (13.07)       | <i>Mean (SD)</i><br>1.18 (0.71)         | <i>Mean (SD)</i><br>34.50 (9.23)           | <i>Mean (SD)</i><br>1.39 (0.26)           | <i>Mean (SD)</i><br>61.64 (7.71)           | <i>Mean (SD)</i><br>2.57 (0.57)           |
|                           | 4  | 9 y    |                                          |                                      |                                         |                                        | <i>Mean (SD)</i><br>24.60 (4.98)        | <i>Mean (SD)</i><br>0.93 (0.47)         | <i>Mean (SD)</i><br>27.13 (11.45)          | <i>Mean (SD)</i><br>0.95 (0.32)           | <i>Mean (SD)</i><br>51.73 (10.77)          | <i>Mean (SD)</i><br>1.88 (0.58)           |
|                           | 7  | 10 y   |                                          |                                      |                                         |                                        | <i>Mean (SD)</i><br>27.64 (12.08)       | <i>Mean (SD)</i><br>0.88 (0.42)         | <i>Mean (SD)</i><br>42.30 (7.78)           | <i>Mean (SD)</i><br>1.34 (0.27)           | <i>Mean (SD)</i><br>69.94 (8.74)           | <i>Mean (SD)</i><br>2.22 (0.34)           |
|                           | 30 | 4-10 y |                                          |                                      |                                         |                                        | <i>Mean (SD)</i><br>24.87 (10.55)       | <i>Mean (SD)</i><br>1.00 (0.49)         | <i>Mean (SD)</i><br>31.61 (10.52)          | <i>Mean (SD)</i><br>1.24 (0.37)           | <i>Mean (SD)</i><br>56.49 (12.16)          | <i>Mean (SD)</i><br>2.24 (0.47)           |

**Supplementary Table S2.** Actual dietary intakes of PKU patients in late childhood (4-10 years of age).

| Reference                        | N  | Age                            | Dietary intakes                |                    |                                            |                                |                               |                               |                                               |                           |                                         |                  |
|----------------------------------|----|--------------------------------|--------------------------------|--------------------|--------------------------------------------|--------------------------------|-------------------------------|-------------------------------|-----------------------------------------------|---------------------------|-----------------------------------------|------------------|
|                                  |    |                                | Energy                         |                    | Phenylalanine                              |                                | Natural protein               |                               | Protein equivalent<br>from protein substitute |                           | Total protein                           |                  |
|                                  |    |                                | <i>kcal/day</i>                | <i>kcal/kg/day</i> | <i>mg/day</i>                              | <i>mg/kg/day</i>               | <i>g/day</i>                  | <i>g/kg/day</i>               | <i>g/day</i>                                  | <i>g/kg/day</i>           | <i>g/day</i>                            | <i>g/kg/day</i>  |
|                                  |    |                                |                                |                    |                                            | <i>Median<br/>(range)</i>      | <i>Median<br/>(range)</i>     | <i>Median<br/>(range)</i>     | <i>Median<br/>(range)</i>                     | <i>Median<br/>(range)</i> | <i>Median<br/>(range)</i>               |                  |
|                                  | 2  | 4 y:                           |                                |                    |                                            |                                | 21.3 (12.0-30.6)              | 1.13 (0.73-1.53)              | 24.5 (24.0-25.0)                              | 1.36 (1.44-1.82)          | 45.8 (37-54.6)                          | 2.49 (2.24-2.73) |
|                                  | 4  | 5 y:                           |                                |                    |                                            |                                | 11.6 (10.7-21.0)              | 0.68 (0.49-0.91)              | 30.4 (24.0-36.0)                              | 1.44 (1.40-2.70)          | 46.6 (34.7-47.8)                        | 2.12 (1.88-2.94) |
|                                  | 2  | 6 y:                           |                                |                    |                                            |                                | 31.2 (25.2-37.2)              | 1.15 (0.74-1.55)              | 33.8 (22.6-45.0)                              | 1.13 (1.13-1.59)          | 65.0 (59.8-70.2)                        | 2.28 (2.06-2.49) |
|                                  | 6  | 7 y:                           |                                |                    |                                            |                                | 21.9 (14.2-38.8)              | 0.79 (0.68-1.36)              | 25.5 (18.0-36.0)                              | 1.03 (0.75-1.80)          | 51.9 (41.6-56.9)                        | 2.01 (1.48-2.35) |
|                                  | 5  | 8 y:                           |                                |                    |                                            |                                | 26.9 (14.8-45.9)              | 1.12 (0.51-2.24)              | 34.5 (20.0-45.0)                              | 1.50 (1.17-1.95)          | 65.9 (48.8-67.5)                        | 2.75 (1.91-3.21) |
|                                  | 4  | 9 y:                           |                                |                    |                                            |                                | 23.0 (20.7-31.8)              | 0.71 (0.67-1.63)              | 25.5 (17.9-42.1)                              | 0.97 (0.65-1.58)          | 50.5 (39.9-66.0)                        | 1.86 (1.21-2.58) |
|                                  | 7  | 10 y:                          |                                |                    |                                            |                                | 20.8 (14.6-44.1)              | 0.62 (0.55-1.48)              | 41.7 (30.0-55.0)                              | 1.28 (1.24-2.05)          | 72.9 (55.6-82.6)                        | 2.22 (1.81-2.75) |
|                                  | 30 | 4-10 y:                        |                                |                    |                                            |                                | 22.0 (10.7-45.9)              | 0.74 (0.49-2.24)              | 30.0 (12.5-55.0)                              | 1.32 (0.54-2.25)          | 56.5 (34.7-82.6)                        | 2.1 (1.21-3.21)  |
| Rohde et al.,<br>2012 &<br>2014a | 14 | <i>Initial</i><br>6 y          | <i>Mean (SD)</i><br>1384 (231) |                    | <i>Mean (SD)</i><br>335 (72)               |                                |                               |                               |                                               |                           | <i>Mean (SD)</i><br>41 (15)             |                  |
|                                  |    |                                |                                |                    | <i>Range</i><br>270-480                    |                                |                               |                               |                                               |                           |                                         |                  |
|                                  | 19 | <i>FU<sub>1</sub></i><br>5.5 y | N/A                            |                    | <i>Mean (SD)</i><br>422 (95)               |                                |                               |                               |                                               |                           | <i>Mean (SD)</i><br>44 (16)             |                  |
|                                  |    |                                |                                | N/A                | <i>Median<br/>(range)</i><br>408 (282-713) | N/A                            | N/A                           |                               | N/A                                           |                           | <i>Median<br/>(range)</i><br>42 (22-83) | N/A              |
|                                  | 16 | <i>FU<sub>2</sub></i><br>6 y   | N/A                            |                    | <i>Mean (SD)</i><br>413 (101)              |                                |                               |                               |                                               |                           | <i>Mean (SD)</i><br>46 (16)             |                  |
|                                  |    |                                |                                |                    | <i>Median<br/>(range)</i><br>410 (259-695) |                                |                               |                               |                                               |                           | <i>Median<br/>(range)</i><br>45 (27-78) |                  |
| Rohde et al.,<br>2015            | 14 | 4 y                            |                                |                    | <i>Mean (SD)</i><br>307.5 (68.8)           | <i>Mean (SD)</i><br>19.0 (4.3) | <i>Mean (SD)</i><br>7.7 (1.7) | <i>Mean (SD)</i><br>0.5 (1.1) |                                               |                           |                                         |                  |
|                                  | 9  | 5 y                            |                                |                    | 328.3 (87.3)                               | 17.6 (6.2)                     | 8.2 (2.2)                     | 0.4 (0.2)                     |                                               |                           |                                         |                  |
|                                  | 9  | 6 y                            |                                |                    | 368.9 (186.9)                              | 15.8 (8.3)                     | 9.2 (4.7)                     | 0.4 (0.2)                     |                                               |                           |                                         |                  |
|                                  | 5  | 7 y                            | N/A                            |                    | 304.0 (61.9)                               | 13.2 (3.7)                     | 7.6 (1.5)                     | 0.3 (0.1)                     | N/A                                           |                           | N/A                                     |                  |
|                                  | 13 | 8 y                            |                                |                    | 405.0 (150.0)                              | 14.6 (6.9)                     | 10.1 (3.7)                    | 0.4 (0.2)                     |                                               |                           |                                         |                  |
|                                  | 12 | 9 y                            |                                |                    | 360.4 (94.1)                               | 11.4 (2.8)                     | 9.0 (2.4)                     | 0.3 (0.1)                     |                                               |                           |                                         |                  |
|                                  | 11 | 10 y                           |                                |                    | 410.0 (133.5)                              | 11.8 (3.4)                     | 10.3 (3.3)                    | 0.3 (0.1)                     |                                               |                           |                                         |                  |

**Supplementary Table S2.** Actual dietary intakes of PKU patients in late childhood (4-10 years of age).

| Reference             | N  | Age    | Dietary intakes                |                    |                                  |                                |                             |                           |                                               |                 |                             |                 |
|-----------------------|----|--------|--------------------------------|--------------------|----------------------------------|--------------------------------|-----------------------------|---------------------------|-----------------------------------------------|-----------------|-----------------------------|-----------------|
|                       |    |        | Energy                         |                    | Phenylalanine                    |                                | Natural protein             |                           | Protein equivalent<br>from protein substitute |                 | Total protein               |                 |
|                       |    |        | <i>kcal/day</i>                | <i>kcal/kg/day</i> | <i>mg/day</i>                    | <i>mg/kg/day</i>               | <i>g/day</i>                | <i>g/kg/day</i>           | <i>g/day</i>                                  | <i>g/kg/day</i> | <i>g/day</i>                | <i>g/kg/day</i> |
|                       | 73 | 4-10 y |                                |                    | 358.9 (122.5)                    | 14.9 (5.9)                     | 9.0 (3.1)                   | 0.4 (0.2)                 |                                               |                 |                             |                 |
|                       |    |        |                                |                    | <i>Median<br/>(range)</i>        | <i>Median<br/>(range)</i>      | <i>Median<br/>(range)</i>   | <i>Median<br/>(range)</i> |                                               |                 |                             |                 |
|                       | 14 | 4 y    |                                |                    | 300 (220-450)                    | 18.6 (12.9-27.8)               | 7.5 (5.5-11.3)              | 0.5 (0.3-0.7)             |                                               |                 |                             |                 |
|                       | 9  | 5 y    |                                |                    | 300 (240-540)                    | 15.8 (12.2-32.7)               | 7.5 (6.0-13.5)              | 0.4 (0.3-0.8)             |                                               |                 |                             |                 |
|                       | 9  | 6 y    |                                |                    | 310 (180-700)                    | 12.0 (7.4-33.2)                | 7.8 (4.5-17.5)              | 0.3 (0.2-0.8)             |                                               |                 |                             |                 |
|                       | 5  | 7 y    |                                |                    | 320 (200-350)                    | 15.2 (7.7-16.4)                | 8.0 (5.0-8.8)               | 0.4 (0.2-0.4)             |                                               |                 |                             |                 |
|                       | 13 | 8 y    |                                |                    | 350 (240-800)                    | 11.9 (8.8-34.2)                | 8.8 (6.0-20.0)              | 0.3 (0.2-0.9)             |                                               |                 |                             |                 |
|                       | 12 | 9 y    |                                |                    | 305 (290-600)                    | 10.4 (7.6-15.9)                | 7.6 (7.3-15.0)              | 0.3 (0.2-0.4)             |                                               |                 |                             |                 |
|                       | 11 | 10 y   |                                |                    | 380 (250-750)                    | 11.2 (7.4-18.0)                | 9.5 (6.3-18.8)              | 0.3 (0.2-0.5)             |                                               |                 |                             |                 |
|                       | 73 | 4-10 y |                                |                    | 320 (180-800)                    | 14.0 (7.4-34.2)                | 8.0 (4.5-20.0)              | 0.4 (0.2-0.9)             |                                               |                 |                             |                 |
| Schulpis et al., 2013 | 30 | 5 y    | <i>Mean (SD)</i><br>2020 (400) | N/A                | N/A                              |                                | <i>Mean (SD)</i><br>9 (1.2) | N/A                       | N/A                                           |                 | <i>Mean (SD)</i><br>70 (18) | N/A             |
|                       |    |        |                                |                    |                                  |                                | <i>Mean (SD)</i>            |                           | <i>Mean (SD)</i>                              |                 | <i>Mean (SD)</i>            |                 |
|                       | 86 | 4 y    |                                |                    |                                  |                                | 0.4 (0.1)                   |                           | 1.5 (0.4)                                     |                 | 1.9 (0.4)                   |                 |
|                       | 83 | 5 y    |                                |                    |                                  |                                | 0.4 (0.1)                   |                           | 1.4 (0.3)                                     |                 | 1.8 (0.4)                   |                 |
| Thiele et al., 2017   | 86 | 6 y    | N/A                            |                    | N/A                              |                                | 0.3 (0.1)                   | N/A                       | 1.4 (0.3)                                     |                 | 1.7 (0.4)                   |                 |
|                       | 82 | 7 y    |                                |                    |                                  |                                | 0.3 (0.1)                   |                           | 1.3 (0.3)                                     | N/A             | 1.6 (0.3)                   |                 |
|                       | 78 | 8 y    |                                |                    |                                  |                                | 0.3 (0.1)                   |                           | 1.2 (0.2)                                     |                 | 1.5 (0.3)                   |                 |
|                       | 79 | 9 y    |                                |                    |                                  |                                | 0.3 (0.1)                   |                           | 1.1 (0.3)                                     |                 | 1.4 (0.3)                   |                 |
|                       | 75 | 10 y   |                                |                    |                                  |                                | 0.2 (0.1)                   |                           | 1.0 (0.3)                                     |                 | 1.2 (0.3)                   |                 |
| Trefz et al., 2009    | 39 | 7 y    | N/A                            |                    | <i>Mean (SD)</i><br>480.5 (43.1) | <i>Mean (SD)</i><br>16.6 (0.4) | N/A                         |                           | N/A                                           |                 | N/A                         |                 |

Abbreviations: PKU, phenylketonuria; N, number of patients in the age group; y, years; SD, standard deviation; N/A, not available; IQR, inter quartile range; BH4, tetrahydrobiopterin; Phe, phenylalanine; FU, follow-up.

<sup>a</sup> BH4<sub>1</sub> and BH4<sub>2</sub> groups refer to baseline data (i.e. pre-BH4 treatment) of patients who were followed for 2 y and 5 y, respectively. Diet<sub>1</sub> and Diet<sub>2</sub> groups refer to baseline and follow up data (at 2 y and 5y) of patients who were treated with Phe-restricted diet only.

<sup>b</sup> Data on dietary Phe intake was available for 15 patients.

**Supplementary Table S3.** Actual dietary intakes of PKU patients during adolescence (11-18 years of age).

| Reference                       | N              | Age                     | Dietary intakes                                                   |                       |                                                                             |                                                                         |                                                       |                                                   |                                                       |                                            |                                                       |                  |
|---------------------------------|----------------|-------------------------|-------------------------------------------------------------------|-----------------------|-----------------------------------------------------------------------------|-------------------------------------------------------------------------|-------------------------------------------------------|---------------------------------------------------|-------------------------------------------------------|--------------------------------------------|-------------------------------------------------------|------------------|
|                                 |                |                         | Energy                                                            | Phenylalanine         | Natural protein                                                             |                                                                         | Protein equivalent from protein substitute            |                                                   | Total protein                                         |                                            |                                                       |                  |
|                                 |                |                         | <i>kcal/day</i>                                                   | <i>mg/day</i>         | <i>mg/kg/day</i>                                                            | <i>g/day</i>                                                            | <i>g/kg/day</i>                                       | <i>g/day</i>                                      | <i>g/kg/day</i>                                       | <i>g/day</i>                               | <i>g/kg/day</i>                                       |                  |
| Aldámiz-Echevarría et al., 2014 | N/A            | 9-12 y<br>12-18 y       | N/A                                                               | N/A                   | <i>Median (IQR)</i><br>8.6 (7.0-11.3)<br>7.6 (5.4-10.3)                     | N/A                                                                     | <i>Median (IQR)</i><br>0.3 (0.2-0.5)<br>0.3 (0.2-0.5) | N/A                                               | <i>Median (IQR)</i><br>1.2 (0.9-1.4)<br>1.0 (0.7-1.3) | N/A                                        | <i>Median (IQR)</i><br>1.2 (1.0-1.7)<br>1.1 (1.0-1.4) |                  |
| Alm et al., 1986                | 18             | 12y                     | N/A                                                               | N/A                   | <i>Mean (SD)</i><br>>47.3 (30.1)<br><i>Median (range)</i><br>25 (20 to >80) | N/A                                                                     |                                                       | N/A                                               |                                                       | N/A                                        |                                                       |                  |
| Daly et al., 2017 <sup>a</sup>  | 21<br>21<br>21 | 11 y<br>11.5 y<br>Total | <i>Range</i><br>1624-1689<br>1630-1690<br>N/A                     | N/A                   |                                                                             | <i>Range</i><br>9.0-10.8<br>9.8-10<br><i>Median (range)</i><br>5 (3-30) | N/A                                                   | N/A<br>N/A<br><i>Median (range)</i><br>60 (60-80) | N/A                                                   | N/A                                        | N/A                                                   |                  |
| Pinto et al., 2019              | 40             | 17 y                    | <i>Median (IQR)</i><br>2365<br>(2202-2575)<br>43.5<br>kcal/kg/day | <i>Median</i><br>1900 | <i>Median (IQR)</i><br>35 (20.9-53.1)                                       | <i>Median (IQR)</i><br>35 (24-70.3)                                     | <i>Median (IQR)</i><br>0.7 (0.42-1.06)                | <i>Median (IQR)</i><br>44.8 (24-55)               | <i>Median (IQR)</i><br>0.82 (0.48-1.04)               | N/A                                        |                                                       |                  |
| Rocha et al., 2012 & 2013       | 8              | 11 y                    |                                                                   |                       |                                                                             | <i>Mean (SD)</i><br>31.41 (13.29)                                       | <i>Mean (SD)</i><br>0.75 (0.33)                       | <i>Mean (SD)</i><br>52.45 (16.04)                 | <i>Mean (SD)</i><br>1.27 (0.46)                       | <i>Mean (SD)</i><br>83.87 (18.0)           | <i>Mean (SD)</i><br>2.03 (0.60)                       |                  |
|                                 | 2              | 12 y                    |                                                                   |                       |                                                                             | 19.35 (3.89)                                                            | 0.34 (0.01)                                           | 66.61 (11.61)                                     | 1.17 (0.07)                                           | 85.96 (15.5)                               | 1.50 (0.08)                                           |                  |
|                                 | 3              | 13 y                    |                                                                   |                       |                                                                             | 30.47 (15.10)                                                           | 0.72 (0.46)                                           | 55.94 (7.70)                                      | 1.22 (0.17)                                           | 86.40 (8.37)                               | 1.94 (0.57)                                           |                  |
|                                 | 1              | 14 y                    |                                                                   |                       |                                                                             | 37.80 (0.00)                                                            | 0.65 (0.00)                                           | 38.51 (0.00)                                      | 0.66 (0.00)                                           | 76.31 (0.00)                               | 1.30 (0.00)                                           |                  |
|                                 | 6              | 15 y                    |                                                                   |                       |                                                                             | 22.32 (6.16)                                                            | 0.41 (0.10)                                           | 53.31 (19.49)                                     | 0.99 (0.37)                                           | 75.63 (16.9)                               | 1.39 (0.30)                                           |                  |
|                                 | 7              | 16 y                    |                                                                   |                       |                                                                             | 29.15 (14.30)                                                           | 0.46 (0.23)                                           | 54.44 (19.45)                                     | 0.84 (0.27)                                           | 83.59 (20.9)                               | 1.30 (0.31)                                           |                  |
|                                 | 2              | 17 y                    | N/A                                                               | N/A                   |                                                                             | 22.60 (3.82)                                                            | 0.41 (0.05)                                           | 71.10 (12.40)                                     | 1.30 (0.16)                                           | 93.70 (16.2)                               | 1.71 (0.22)                                           |                  |
|                                 | 3              | 18 y                    |                                                                   |                       |                                                                             | 18.77 (2.87)                                                            | 0.29 (0.03)                                           | 65.62 (3.44)                                      | 1.03 (0.08)                                           | 84.38 (3.31)                               | 1.32 (0.05)                                           |                  |
|                                 | 32             | 11-18 y                 |                                                                   |                       |                                                                             | 26.83 (11.34)                                                           | 0.53 (0.28)                                           | 56.23 (15.89)                                     | 1.07 (0.35)                                           | 83.06 (15.7)                               | 1.60 (0.49)                                           |                  |
|                                 |                |                         |                                                                   |                       |                                                                             | <i>Median (range)</i><br>28.0 (16.5-57.4)                               | <i>Median(range)</i><br>0.69 (0.40-1.30)              | <i>Median (range)</i><br>53.81 (19.6-74.3)        | <i>Median(range)</i><br>1.24 (0.49-2.17)              | <i>Median (range)</i><br>80.6 (54.7-113.4) | <i>Median (range)</i><br>1.91 (1.14-3.00)             |                  |
|                                 |                | 8                       | 11 y                                                              |                       |                                                                             |                                                                         | 19.4 (16.6-22.1)                                      | 0.34 (0.33-0.35)                                  | 66.61 (58.4-74.8)                                     | 1.17 (1.34-1.46)                           | 86.0 (75.0-96.9)                                      | 1.50 (1.45-1.56) |
|                                 |                | 2                       | 12 y                                                              |                       |                                                                             |                                                                         | 26.0 (18.1-47.3)                                      | 0.65 (0.29-1.21)                                  | 55.00 (48.7-64.1)                                     | 1.25 (1.25-1.65)                           | 82.2 (81.0-96.1)                                      | 2.03 (1.34-2.46) |



**Supplementary Table S3.** Actual dietary intakes of PKU patients during adolescence (11-18 years of age).

| Reference              | N  | Age     | Dietary intakes |                       |                       |                       |                                               |                   |                  |                   |                  |
|------------------------|----|---------|-----------------|-----------------------|-----------------------|-----------------------|-----------------------------------------------|-------------------|------------------|-------------------|------------------|
|                        |    |         | Energy          | Phenylalanine         | Natural protein       |                       | Protein equivalent<br>from protein substitute |                   | Total protein    |                   |                  |
|                        |    |         | <i>kcal/day</i> | <i>mg/day</i>         | <i>mg/kg/day</i>      | <i>g/day</i>          | <i>g/kg/day</i>                               | <i>g/day</i>      | <i>g/kg/day</i>  | <i>g/day</i>      | <i>g/kg/day</i>  |
|                        | 1  | 14 y    |                 |                       |                       | 37.8 (-)              | 0.65 (-)                                      | 38.51 (-)         | 0.66 (-)         | 76.3 (-)          | 1.30 (-)         |
|                        | 6  | 15 y    |                 |                       |                       | 23.5 (14.3-30.3)      | 0.39 (0.29-0.55)                              | 59.03 (14.8-68.7) | 1.08 (0.32-1.58) | 78.6 (45.1-92.6)  | 1.45 (0.81-1.64) |
|                        | 7  | 16 y    |                 |                       |                       | 26.7 (15.8-56.2)      | 0.45 (0.21-0.86)                              | 62.79 (17.7-69.7) | 0.92 (0.35-1.25) | 85.7 (55.1-122.3) | 1.22 (0.91-1.88) |
|                        | 2  | 17 y    |                 |                       |                       | 22.6 (19.9-25.3)      | 0.41 (0.37-0.45)                              | 71.10 (62.3-79.8) | 1.30 (1.42-1.70) | 93.7 (82.2-105.2) | 1.71 (1.56-1.87) |
|                        | 3  | 18 y    |                 |                       |                       | 18.4 (16.1-21.8)      | 0.28 (0.27-0.33)                              | 65.00 (62.5-69.3) | 1.06 (1.12-1.30) | 84.3 (81.1-87.7)  | 1.34 (1.26-1.35) |
|                        | 32 | 11-18 y |                 |                       |                       | 23.45 (14.3-57.4)     | 0.45 (0.21-1.30)                              | 61.67 (14.8-79.9) | 1.07 (0.27-1.81) | 82.2 (45.1-122.3) | 1.47 (0.81-3.00) |
| Rohde et al.,<br>2015  |    |         |                 | <i>Mean (SD)</i>      | <i>Mean (SD)</i>      | <i>Mean (SD)</i>      | <i>Mean (SD)</i>                              |                   |                  |                   |                  |
|                        | 4  | 11 y    |                 | 350.0 (147.2)         | 9.07 (2.20)           | 8.75 (3.68)           | 0.23 (0.05)                                   |                   |                  |                   |                  |
|                        | 7  | 12 y    |                 | 453.6 (148.7)         | 8.82 (2.86)           | 11.34 (3.72)          | 0.22 80.07)                                   |                   |                  |                   |                  |
|                        | 11 | 13 y    |                 | 387.3 (164.4)         | 10.8 (5.36)           | 9.68 (4.11)           | 0.27 (0.13)                                   |                   |                  |                   |                  |
|                        | 2  | 14 y    |                 | 595.0 (219.2)         | 11.13 (1.10)          | 14.88 (5.48)          | 0.28 (0.03)                                   |                   |                  |                   |                  |
|                        | 6  | 15 y    |                 | 501.7 (165.6)         | 7.92 (2.13)           | 12.54 (4.14)          | 0.20 (0.05)                                   |                   |                  |                   |                  |
|                        | 30 | 11-15 y |                 | 434.5 (164.8)         | 9.56 (3.80)           | 10.86 (4.12)          | 0.24 (0.09)                                   |                   |                  |                   |                  |
|                        |    |         | N/A             |                       |                       |                       |                                               | N/A               |                  | N/A               |                  |
|                        |    |         |                 | <i>Median (range)</i> | <i>Median (range)</i> | <i>Median (range)</i> | <i>Median(range)</i>                          |                   |                  |                   |                  |
|                        | 4  | 11 y    |                 | 325 (200-550)         | 9.87 (5.83-10.71)     | 8.13 (5.00-13.75)     | 0.25 (0.15-0.27)                              |                   |                  |                   |                  |
|                        | 7  | 12 y    |                 | 450 (300-750)         | 8.57 (5.18-12.72)     | 11.25 (7.5-18.75)     | 0.21 (0.13-0.32)                              |                   |                  |                   |                  |
|                        | 11 | 13 y    |                 | 320 (190-650)         | 9.47 (4.09-20.97)     | 8.00 (4.75-16.25)     | 0.24 (0.10-0.52)                              |                   |                  |                   |                  |
|                        | 2  | 14 y    |                 | 595 (440-750)         | 11.1 (10.35-11.9)     | 14.9 (11.0-18.75)     | 0.28 (0.26-0.30)                              |                   |                  |                   |                  |
|                        | 6  | 15 y    |                 | 450 (350-750)         | 7.22 (6.25-11.95)     | 11.3 (8.75-18.75)     | 0.18 (0.16-0.30)                              |                   |                  |                   |                  |
|                        | 30 | 11-15 y |                 | 420 (190-750)         | 9.03 (4.09-20.97)     | 10.5 (4.75-18.75)     | 0.23 (0.10-0.52)                              |                   |                  |                   |                  |
| Thiele et al.,<br>2017 |    |         |                 |                       |                       | <i>Mean (SD)</i>      |                                               | <i>Mean (SD)</i>  |                  | <i>Mean (SD)</i>  |                  |
|                        | 70 | 11 y    |                 |                       |                       | 0.2 (0.1)             |                                               | 1.0 (0.3)         |                  | 1.2 (0.3)         |                  |
|                        | 70 | 12 y    |                 |                       |                       | 0.2 (0.1)             |                                               | 1.0 (0.3)         |                  | 1.1 (0.3)         |                  |
|                        | 67 | 13 y    |                 |                       |                       | 0.2 (0.1)             |                                               | 0.9 (0.2)         |                  | 1.1 (0.3)         |                  |
|                        | 65 | 14 y    | N/A             | N/A                   |                       | 0.2 (0.1)             | N/A                                           | 0.9 (0.2)         | N/A              | 1.1 (0.2)         |                  |
|                        | 58 | 15 y    |                 |                       |                       | 0.2 (0.1)             |                                               | 0.9 (0.2)         |                  | 1.0 (0.2)         |                  |
|                        | 53 | 16 y    |                 |                       |                       | 0.2 (0.1)             |                                               | 0.9 (0.2)         |                  | 1.0 (0.2)         |                  |
|                        | 53 | 17 y    |                 |                       |                       | 0.2 (0.1)             |                                               | 0.8 (0.1)         |                  | 1.0 (0.2)         |                  |
|                        | 47 | 18 y    |                 |                       |                       | 0.2 (0.1)             |                                               | 0.8 (0.1)         |                  | 1.0 (0.1)         |                  |

Abbreviations: PKU, phenylketonuria; N, number of patients in the age group; y, years; SD, standard deviation; N/A, not available; IQR, inter quartile range.

<sup>a</sup> In the original article, there were two study groups based on the type of protein substitute used; 1) GMP group prescribed with glycomacropeptides ; 2) AAM group using amino acid mixtures as the protein substitute. Range on energy (kcal/day) and natural protein intakes refer to the mean range of intakes of both groups.

**Supplementary Table S4.** Actual dietary intakes of adult PKU patients (>18 years of age).

| Reference                 | N  | Age    | Dietary Intakes                             |                                        |                                             |                                       |                                            |                                              |                                            |                                              |                                            |                                              |
|---------------------------|----|--------|---------------------------------------------|----------------------------------------|---------------------------------------------|---------------------------------------|--------------------------------------------|----------------------------------------------|--------------------------------------------|----------------------------------------------|--------------------------------------------|----------------------------------------------|
|                           |    |        | Energy                                      |                                        | Phenylalanine                               |                                       | Natural protein                            |                                              | Protein equivalent from protein substitute |                                              | Total protein                              |                                              |
|                           |    |        | <i>kcal/day</i>                             | <i>kcal/kg/day</i>                     | <i>mg/day</i>                               | <i>mg/kg/day</i>                      | <i>g/day</i>                               | <i>g/kg/day</i>                              | <i>g/day</i>                               | <i>g/kg/day</i>                              | <i>g/day</i>                               | <i>g/kg/day</i>                              |
| Green et al., 2019        | 16 | 29.5 y | <i>Mean (SD)</i><br>1813 (445)              | <i>Mean</i><br>25.5                    | N/A                                         |                                       | <i>Mean (SD)</i><br>18.3 (7.7)             | <i>Mean</i><br>0.3                           | <i>Mean (SD)</i><br>58.6 (10.2)            | <i>Mean</i><br>0.8                           | <i>Mean (SD)</i><br>76.9 (13.4)            | <i>Mean</i><br>1.1                           |
| Rohde et al., 2014b       | 41 | 24 y   | <i>Mean (SD)</i><br>1967 (593.6)            | <i>Mean (SD)</i><br>31 (12.3)          | <i>Mean (SD)</i><br>1424 (711.3)            | <i>Mean (SD)</i><br>23 (13.1)         | <i>Mean (SD)</i><br>36 (18.1)              | <i>Mean (SD)</i><br>0.56 (0.31)              | <i>Mean (SD)</i><br>41 (16.2)              | <i>Mean (SD)</i><br>0.64 (0.26)              | <i>Mean (SD)</i><br>77 (21.6)              | <i>Mean (SD)</i><br>1.2 (0.36)               |
|                           |    |        | <i>Median (range)</i><br>1916<br>(857-3579) | <i>Median (range)</i><br>30<br>(14-67) | <i>Median (range)</i><br>1160<br>(618-3055) | <i>Median (range)</i><br>19<br>(8-74) | <i>Median (range)</i><br>28<br>(15-80)     | <i>Median (range)</i><br>0.46<br>(0.23-1.74) | <i>Median (range)</i><br>43<br>(5-70)      | <i>Median (range)</i><br>0.62<br>(0.07-1.24) | <i>Median (range)</i><br>79<br>(30-133)    | <i>Median (range)</i><br>1.15<br>(0.42-2.29) |
|                           |    |        |                                             |                                        |                                             |                                       | <i>Mean (SD)</i><br>33.62 (24.86)          | <i>Mean (SD)</i><br>0.54 (0.36)              | <i>Mean (SD)</i><br>53.6 (19.11)           | <i>Mean (SD)</i><br>0.89 (0.34)              | <i>Mean (SD)</i><br>86.7 (1.44)            | <i>Mean (SD)</i><br>1.44 (0.35)              |
| Rocha et al., 2012 & 2013 | 25 | 22 y   | N/A                                         |                                        | N/A                                         |                                       | <i>Median (range)</i><br>23.7 (12.6-104.2) | <i>Median (range)</i><br>0.42 (0.24-1.77)    | <i>Median (range)</i><br>57.6 (9.33-89.4)  | <i>Median (range)</i><br>0.95 (0.17-1.46)    | <i>Median (range)</i><br>80.4 (38.1-141.4) | <i>Median (range)</i><br>1.37 (0.68-2.27)    |

Abbreviations: PKU, phenylketonuria; N, number of patients in the age group; mo, months; y, years; SD, standard deviation; N/A, not available.

**Supplementary Table S5.** Dietary prescriptions of the patients with PKU in the included studies.

| Reference             | N                  | Age    | Dietary prescriptions |                   |                   |                     |                                               |                |                |                |
|-----------------------|--------------------|--------|-----------------------|-------------------|-------------------|---------------------|-----------------------------------------------|----------------|----------------|----------------|
|                       |                    |        | Phenylalanine         |                   | Natural protein   |                     | Protein equivalent<br>from protein substitute |                | Total protein  |                |
|                       |                    |        | mg/day                | mg/kg/day         | g/day             | g/kg/day            | g/day                                         | g/kg/day       | g/day          | g/kg/day       |
| Evans et al.,<br>2018 | 7                  | 3 mo   | N/A                   |                   | Median<br>(range) | Median (range)      | Median                                        | Median         | Median (range) | Median (range) |
|                       | 19                 | 4 mo   |                       | 4 (3-5)           | 0.6 (0.4-0.8)     | 12                  | 1.9                                           | 16 (15-18)     | 2.5 (1.8-2.8)  |                |
|                       | 24                 | 5 mo   |                       | 4 (3-8)           | 0.6 (0.4-1.0)     | 14                  | 2.2                                           | 19 (11-25)     | 2.7 (1.3-3.7)  |                |
|                       | 30                 | 6 mo   |                       | 4 (3-8)           | 0.6 (0.4-0.9)     | 17                  | 2.4                                           | 21 (17-27)     | 2.9 (2.2-4.1)  |                |
|                       | 31                 | 7 mo   |                       | 4 (3-8)           | 0.5 (0.3-1.0)     | 20                  | 2.5                                           | 23 (13-29)     | 3.0 (2.1-4.2)  |                |
|                       | 31                 | 8 mo   |                       | 4 (3-8)           | 0.5 (0.3-1.0)     | 22                  | 2.8                                           | 26 (17-33)     | 3.2 (2.3-4.2)  |                |
|                       | 31                 | 9 mo   |                       | 4 (3-8)           | 0.5 (0.3-1.0)     | 24                  | 2.9                                           | 27 (18-34)     | 3.3 (2.6-4.2)  |                |
|                       | 31                 | 10 mo  |                       | 4 (3-8)           | 0.5 (0.3-1.0)     | 25                  | 3.0                                           | 29 (21-34)     | 3.3 (2.7-3.9)  |                |
|                       | 31                 | 11 mo  |                       | 4 (3-8)           | 0.4 (0.3-1.0)     | 27                  | 3.0                                           | 30 (23-35)     | 3.3 (2.6-4.0)  |                |
|                       | 31                 | 12 mo  |                       | 4 (3-8)           | 0.4 (0.3-1.0)     | 28                  | 3.0                                           | 30 (23-40)     | 3.3 (2.4-4.0)  |                |
|                       | 31                 | 13 mo  |                       | 4 (3-9)           | 0.4 (0.3-1.0)     | 30                  | 3.1                                           | 31 (23-50)     | 3.3 (2.4-4.3)  |                |
|                       | 31                 | 14 mo  |                       | 4 (3-8)           | 0.4 (0.3-1.0)     | 32                  | 3.2                                           | 32 (23-45)     | 3.3 (2.7-4.2)  |                |
|                       | 31                 | 15 mo  |                       | 4 (3-11)          | 0.4 (0.3-1.0)     | 32                  | 3.2                                           | 33 (26-47)     | 3.3 (2.6-4.2)  |                |
|                       | 31                 | 16 mo  |                       | 4 (3-11)          | 0.4 (0.2-1.0)     | 34                  | 3.1                                           | 34 (26-45)     | 3.3 (2.6-4.2)  |                |
|                       | 31                 | 17 mo  |                       | 4 (3-11)          | 0.4 (0.2-1.0)     | 33                  | 3.2                                           | 34 (26-45)     | 3.2 (2.4-3.7)  |                |
|                       | 31                 | 18 mo  |                       | 4 (3-11)          | 0.4 (0.2-1.0)     | 34                  | 3.2                                           | 34 (27-45)     | 3.2 (2.4-3.7)  |                |
|                       | 31                 | 19 mo  |                       | 4 (3-11)          | 0.4 (0.2-1.0)     | 35                  | 3.2                                           | 35 (29-45)     | 3.2 (2.4-3.7)  |                |
|                       | 30                 | 20 mo  |                       | 4 (3-11)          | 0.4 (0.2-1.0)     | 37                  | 3.3                                           | 35 (29-45)     | 3.2 (2.4-3.7)  |                |
|                       | 30                 | 21 mo  |                       | 4 (3-11)          | 0.4 (0.2-1.0)     | 38                  | 3.3                                           | 36 (29-46)     | 3.2 (2.4-3.8)  |                |
|                       | 29                 | 22 mo  |                       | 4 (3-11)          | 0.4 (0.2-1.0)     | 37                  | 3.4                                           | 37 (29-46)     | 3.3 (2.5-3.7)  |                |
|                       | 29                 | 23 mo  |                       | 4 (3-11)          | 0.4 (0.2-1.0)     | 39                  | 3.4                                           | 37 (29-46)     | 3.2 (2.5-3.7)  |                |
|                       | 29                 | 24 mo  |                       | 4 (3-11)          | 0.4 (0.2-0.9)     | 37                  | 3.2                                           | 37 (29-46)     | 3.2 (2.5-3.7)  |                |
|                       | Evers et al., 2018 |        |                       |                   |                   | Mean (SD)           | Mean (SD)                                     | Mean (SD)      | Mean (SD)      | Mean (SD)      |
| BH4: 18 <sup>b</sup>  |                    | 11.2 y |                       |                   | 0.41 (0.21)       |                     | 1.05 (0.47)                                   |                | 1.46 (0.68)    |                |
| Diet: 19              |                    | 13.0 y |                       | 9.50 (9.96)       | 0.35 (0.26)       | 40.80 (20.91)       | 0.98 (0.31)                                   | 50.30 (30.87)  | 1.33 (0.57)    |                |
| Diet: 17              |                    | 18.0 y |                       | 14.98 (10.00)     | 0.25 (1.17)       | 54.30 (16.96)       | 0.91 (0.29)                                   | 69.28 (26.96)  | 1.16 (1.46)    |                |
|                       |                    |        |                       | Median<br>(range) | Median (range)    | Median (range)      | Median (range)                                | Median (range) | Median (range) |                |
| BH4: 18               |                    | 11.2 y |                       |                   | 0.38 (0.15-0.94)  |                     | 0.96 (0.18-1.94)                              |                | 1.34           |                |
| Diet: 19              |                    | 12.0 y |                       |                   | 0.28 (0.08-0.98)  | 40.80 (14.20-85.40) | 1.00 (0.43-1.52)                              | 50.30          | 1.28           |                |
|                       |                    |        |                       | 9.50 (5.20-35.0)  | 0.19 (0.07-0.63)  | 60.00 (18.0-80.0)   | 0.96 (0.31-1.45)                              | 70.50          | 1.15           |                |

**Supplementary Table S5.** Dietary prescriptions of the patients with PKU in the included studies.

| Reference                | N  | Age              | Dietary prescriptions                                                      |                                        |                                     |                 |                                                                   |                                              |               |                                        |
|--------------------------|----|------------------|----------------------------------------------------------------------------|----------------------------------------|-------------------------------------|-----------------|-------------------------------------------------------------------|----------------------------------------------|---------------|----------------------------------------|
|                          |    |                  | Phenylalanine                                                              |                                        | Natural protein                     |                 | Protein equivalent from protein substitute                        |                                              | Total protein |                                        |
|                          |    |                  | <i>mg/day</i>                                                              | <i>mg/kg/day</i>                       | <i>g/day</i>                        | <i>g/kg/day</i> | <i>g/day</i>                                                      | <i>g/kg/day</i>                              | <i>g/day</i>  | <i>g/kg/day</i>                        |
|                          |    |                  |                                                                            |                                        | 10.50 (6.0-35.0)                    |                 |                                                                   |                                              |               |                                        |
| Ferguson et al., 1996    | 12 | 9-15 y           | <i>Mean (SD)</i><br>373.3 (40.4)<br><i>Median (range)</i><br>350 (350-420) | N/A                                    |                                     | N/A             |                                                                   | N/A                                          |               | N/A                                    |
| Gökmen-Özel et al., 2011 | 14 | 6 y              | <i>Mean (range)</i><br>250 (150-1500)                                      | <i>Mean (range)</i><br>10.4 (6.3-62.5) |                                     | N/A             |                                                                   | N/A                                          |               | N/A                                    |
| Green et al., 2019       | 16 | 29.5 y           |                                                                            | N/A                                    |                                     | N/A             | <i>Mean (SD)</i><br>59 (9)<br><b>Median (range)</b><br>60 (40-80) | <i>Mean</i><br>0.84<br><b>Median</b><br>0.84 |               | N/A                                    |
| MacDonald et al., 1996   | 2  | 0-1 y            |                                                                            |                                        | <i>Mean (SD)</i><br>5.0 (2.83)      |                 |                                                                   |                                              |               | <i>Mean (SD)</i><br>3.0 (N/A)          |
|                          | 8  | 2-5 y            |                                                                            |                                        | 3.8 (0.85)                          |                 |                                                                   |                                              |               | 2.5 (N/A)                              |
|                          | 5  | 6-10 y           |                                                                            |                                        | 6.8 (3.91)                          |                 |                                                                   |                                              |               | 2.0 (N/A)                              |
|                          | 4  | 11 y <           | N/A                                                                        |                                        | 12.8 (3.77)                         | N/A             |                                                                   | N/A                                          | N/A           | 1.5 (N/A)                              |
|                          | 19 | Total            |                                                                            |                                        | 6.6 (4.30)                          |                 |                                                                   |                                              |               | 2.2 (0.5)                              |
|                          |    | median age: 4y   |                                                                            |                                        | <i>Median (range)</i><br>5.0 (3-17) |                 |                                                                   |                                              |               | <i>Median (range)</i><br>2.5 (1.5-3.0) |
| MacDonald et al., 2003   | 9  | 2-5 y            |                                                                            |                                        | <i>Mean (SD)</i><br>5.9 (3.3)       |                 |                                                                   |                                              |               | <i>Mean (SD)</i><br>2.5 (N/A)          |
|                          | 7  | 6-11 y           |                                                                            |                                        | 6.3 (1.4)                           |                 |                                                                   |                                              |               | 2.0 (N/A)                              |
|                          | 16 | Total            | N/A                                                                        |                                        | 6.1 (2.6)                           | N/A             |                                                                   | N/A                                          | N/A           | 2.3 (0.3)                              |
|                          |    | median age: 4.5y |                                                                            |                                        | <i>Median (range)</i><br>6.0 (3-14) |                 |                                                                   |                                              |               | <i>Median (range)</i><br>2.5 (2.0-2.5) |

**Supplementary Table S5.** Dietary prescriptions of the patients with PKU in the included studies.

| Reference                 | N                | Age   | Dietary prescriptions |                  |                 |                 |                                            |                 |               |                  |
|---------------------------|------------------|-------|-----------------------|------------------|-----------------|-----------------|--------------------------------------------|-----------------|---------------|------------------|
|                           |                  |       | Phenylalanine         |                  | Natural protein |                 | Protein equivalent from protein substitute |                 | Total protein |                  |
|                           |                  |       | <i>mg/day</i>         | <i>mg/kg/day</i> | <i>g/day</i>    | <i>g/kg/day</i> | <i>g/day</i>                               | <i>g/kg/day</i> | <i>g/day</i>  | <i>g/kg/day</i>  |
| Wendel et al., 1990       | 137 <sup>a</sup> | 6 mo  | <i>Mean (SD)</i>      | <i>Mean (SD)</i> |                 |                 |                                            |                 |               |                  |
|                           | 138              | 1 y   | 251 (46)              | 34 (7)           |                 |                 |                                            |                 |               |                  |
|                           | 135              | 1.5 y | 262 (52)              | 28 (7)           |                 |                 |                                            |                 |               |                  |
|                           | 137              | 1.5 y | 275 (56)              | 26 (6)           |                 |                 |                                            |                 |               | <i>Mean (SD)</i> |
|                           | 105              | 2 y   | 276 (56)              | 23 (5)           |                 |                 |                                            |                 |               | 2.26 (0.47)      |
|                           | 98               | 2.5 y | N/A                   | 22 (5)           |                 |                 |                                            |                 |               | 2.17 (0.42)      |
|                           | 98               | 3 y   | N/A                   | 21 (5)           | N/A             |                 | N/A                                        |                 | N/A           | 2.20 (0.40)      |
|                           | 96               | 3.5 y | N/A                   | 19 (5)           |                 |                 |                                            |                 |               | 2.20 (0.38)      |
|                           | 89               | 4 y   | N/A                   | 18 (5)           |                 |                 |                                            |                 |               | N/A              |
|                           | 78               | 4.5 y | N/A                   | 18 (5)           |                 |                 |                                            |                 |               |                  |
|                           | 65               | 5 y   | N/A                   | 17 (5)           |                 |                 |                                            |                 |               |                  |
|                           | 55               | 5.5 y | N/A                   | 16 (4)           |                 |                 |                                            |                 |               |                  |
|                           | 52               | 6 y   | N/A                   | 15 (5)           |                 |                 |                                            |                 |               |                  |
| van Spronsen et al., 2009 | 58               | 6 mo  | <i>Mean (SD)</i>      | <i>Mean (SD)</i> |                 |                 |                                            |                 |               |                  |
|                           | 59               | 6 mo  | 253 (85)              | 35 (13)          |                 |                 |                                            |                 |               |                  |
|                           | 59               | 1 y   | 280 (66)              | 29 (7)           |                 |                 |                                            |                 |               |                  |
|                           | 57               | 2 y   | 316 (106)             | 26 (9)           | N/A             |                 | N/A                                        |                 | N/A           |                  |
|                           | 56               | 3 y   | 359 (171)             | 25 (11)          |                 |                 |                                            |                 |               |                  |
|                           | 59               | 5 y   | 386 (170)             | 21 (9)           |                 |                 |                                            |                 |               |                  |
|                           | N/A              | 10 y  | 431 (178)             | 14 (6)           |                 |                 |                                            |                 |               |                  |

Abbreviations: PKU, phenylketonuria; N, number of patients in the age group; mo, months; y, years; SD, standard deviation; N/A, not available. <sup>a</sup> The number of patients for total protein intake at 6 months was 136. <sup>b</sup>There were two cohorts in this study: 1) sapropterin -treated group (N=21), and 2) diet-only treated group (N=19). Only data at baseline (pre- sapropterin treatment) were included in the analysis in the sapropterin -treated group.
